# Supplementary material for: Some maternal lineages of domestic horses may have origins in East Asia revealed with further evidence of mitochondrial genomes and HVR-1 sequences
Source: PeerJ. 2018 Jun 1;6:e4896. doi: 10.7717/peerj.4896 (PMC5985762; doi:10.7717/peerj.4896)
Supplement: Table S1 [file peerj-06-4896-s001.xlsx]

## Sheet: Sheet1
NCBI Number	Breed	Location	Classification type	Reference
MG001413	Lijiang horse	Yunnan Province	Southwest horse group	This study
MG001414	Yimen horse	Yunnan Province	Southwest horse group	This study
MG001415	Tengchong horse	Yunnan Province	Southwest horse group	This study
MG001416	Debao pony	Guangxi Province	Pony group	This study
MG001417	Baise pony	Guangxi Province	Pony group	This study
MG001418	Lijiang horse	Yunnan Province	Southwest horse group	This study
MG001419	Yingjiang horse	Yunnan Province	Southwest horse group	This study
MG001420	Yili horse	Xinjiang Province	Kazakhstan groups	This study
MG001421	Yanqi horse	Xinjiang Province	Kazakhstan groups	This study
MG001424	Yunnan Pony	Yunnan Province	Pony group	This study
MG001425	Tengchong horse	Yunnan Province	Southwest horse group	This study
MG001426	Chakouyi horse	Gansu Province	Hequ horse group	This study
MG001427	Tengchong horse	Yunnan Province	Southwest horse group	This study
MG001428	Jinjiang horse	Fujian Province	Southwest horse group	This study
MG001429	Yili horse	Xinjiang Province	Kazakhstan groups	This study
MG001430	Yingjiang horse	Yunnan Province	Southwest horse group	This study
MG001431	Jinjiang horse	Fujian Province	Southwest horse group	This study
MG001432	Guizhou horse	Guizhou Province	Southwest horse group	This study
MG001433	Jinjiang horse	Fujian Province	Southwest horse group	This study
MG001434	Yili horse	Xinjiang Province	Kazakhstan groups	This study
MG001435	Zhaotong horse	Yunnan Province	Southwest horse group	This study
MG001436	Yanqi horse	Xinjiang Province	Kazakhstan groups	This study
MG001439	Changdu horse	Tibet	Tibet horse group	This study
MG001440	Zhaotong horse	Yunnan Province	Southwest horse group	This study
MG001441	Yimen horse	Yunnan Province	Southwest horse group	This study
MG001442	Yanqi horse	Xinjiang Province	Kazakhstan groups	This study
MG001443	Debao pony	Guangxi Province	Pony group	This study
MG001444	Chakouyi horse	Gansu Province	Hequ horse group	This study
MG001446	Tengchong horse	Yunnan Province	Southwest horse group	This study
MG001447	Baise pony	Guangxi Province	Pony group	This study
MG001448	Yimen horse	Yunnan Province	Southwest horse group	This study
