# Supplementary material for: Some maternal lineages of domestic horses may have origins in East Asia revealed with further evidence of mitochondrial genomes and HVR-1 sequences
Source: PeerJ. 2018 Jun 1;6:e4896. doi: 10.7717/peerj.4896 (PMC5985762; doi:10.7717/peerj.4896)
Supplement: Table S2 [file peerj-06-4896-s002.xlsx]

## Sheet: Sheet1
Fragment	Forward primer (5'-3')				Reverse primer (5'-3')					Amplified size (bp)			Annealing temperature Tm(°C)
1	5’-CTGAACCGTATATCCTCCTCTA-3’				5’-TACTGTAGACACTTCTCGTTTG-3’					1081bp			59
2	5’-ATCCAGACGCATATACAACA-3’				5’-AGAAGCCAGAGAAGAAGAAG-3’					2248bp			56
3	5’-CGACAACACCTAATGACCCAC-3’				5’-GCGATGAGTACGAGTAGCG-3’					927bp			59
4	5’-CCGCTTGATACTGACACTT-3’				5’-TCGTAGGCTAGGCTGATG-3’					455bp			56
5	5’-GCTACTCGTACTCATCGCATTCTTGA-3’				5’-CCTATATCACTTCATGGTGTTGGA-3’					1595bp			51
6	5’-AGGCTACGGAATACTACGA-3’				5’-TTAGAGATGTGGTGGTGAAG-3’					1982bp			56
7	5’-AATAGTTGTAGCAGGCGTCTT-3’				5’-AATGTGTAAGAGCCGTAGTAGA-3’					1979bp			62
8	5’-GAATCTGCCTAATCCTCCA-3’				5’-ATTGGGACACGCAGTTGAG-3’					1488bp			58
9	5’-GCTCCACCATCAACACCCA-3’				5’-GTGGCTGAGCAAGGTGTTATG-3’					1433bp			58
10	5’-GTTAATGTAGCTTAATAATAT-3’				5’-CCTTGTTACGACTTGTCT-3’					1016bp			52
11	5’-ATGGGATGGAGAGAAATGGGCTACA-3’				5’-TCTTTCATCGTTCCCTTACGGTACT-3’					478bp			52
12	5’-GCTTAATTGAATCAGGCCATG-3’				5’-GGAACAAGTGATTATGCTACC-3’					1169bp			52
13	5’-CAGCCATCAATTAAGAAGAAAGCGTTCA-3’				5’-TCTTCACGGGAAGGTCAATTTCACT-3’					519bp			56
14	5’-TCACCTCTAGCATTTCCAGT-3’				5’-GATGATGTTAGTGGTTGTAGTA-3’					1009bp			50
15	5’-CGTTCTCCTCCTAATTGTCC-3’				5’-CATGGTGTAATTCGGTAGCA-3’					1076bp			59
16	5’-GTCTCACTTCCAATCATACTATCC-3’				5’-CTATATCAGGTGCTCCAATTATCAG-3’					1954bp			56
17	5’-GGACTTGATAAGAAGAGGATTC-3’				5’-TGCCGTAATAAGGACAGATC-3’					649bp			59
	Note: All of the DNA fragments amplified with those primers have overlapped sequences.
