# Supplementary material for: Some maternal lineages of domestic horses may have origins in East Asia revealed with further evidence of mitochondrial genomes and HVR-1 sequences
Source: PeerJ. 2018 Jun 1;6:e4896. doi: 10.7717/peerj.4896 (PMC5985762; doi:10.7717/peerj.4896)
Supplement: Table S3 [file peerj-06-4896-s003.xlsx]

## Sheet: Sheet1
Serial number	NCBI number	Haplogroup	Divergence time(ky)	Breed	Region
1	JQ340110	Aw	4	Unspecified Breed	East Asia
2	JQ340161	Aw	3.2	Unspecified Breed	East Asia
3	HQ439441	Aw	3.4	Akhal-Teke	West Asia
4	JQ340149	Aw	4	Unspecified Breed	East Asia
5	AP013101	Aw	3.8	Japan's horse	East Asia
6	AP013102	Aw	2.5	Japan's horse	East Asia
7	AP013080	Aw	13.6	Japan's horse	East Asia
8	JN398377	Aw	3.8	Chincoteague Pony	Europe
9	X79547	Aw	4.3	Swedish horse	Europe
10	HQ439491	Aw	4.3	Rhineland Heavy Draft	Europe
11	JN398380	Aw	3.7	Arabian	West Asia
12	JN398379	Aw	4.5	Maremmano	Europe
13	KC202957	Aw	3.7	Thoroughbred	Europe
14	HQ439475	Aw	3.4	Kuznet	Europe
15	JN398382	Aw	2	Maremmano	Europe
16	JN398381	Aw	2	Maremmano	Europe
17	MG001432	Aw	4.1	Guizhou horse	East Asia
18	JQ340116	Aw	3.6	Unspecified Breed	East Asia
19	FJ718998	Aw	3.6	China demestic horse	East Asia
20	KC202956	Aw	3.2	Thoroughbred	Europe
21	MG001416	Aw	3.6	Debao horse	East Asia
22	MG001435	Aw	3.2	Zhaotong horse	East Asia
23	JN398378	Aw	2.5	Caspian Pony	West Asia
24	AP013084	Aw	3.7	Japan's horse	East Asia
25	JN398385	Aw	2.7	Akhal-Teke	West Asia
26	KT368738	Aw	2.7	Yakutian	West Asia
27	JN398384	Aw	3.4	Unspecified Syrian Breed	West Asia
28	JN398383	Aw	4.5	Unspecified Iranian Breed	West Asia
29	KT368757	A-K	6.3	Equus przewalskii	West Asia
30	KT368725	A-K	5.1	Ancient/Batagai	ancient
31	KT368723	A-K	5.1	Ancient/Yukagir	ancient
32	KC202959	Bw	3.2	Thoroughbred	Europe
33	JN398387	Bw	3.5	Maremmano	Europe
34	JQ340096	Bw	3.7	Unspecified Breed	East Asia
35	JN398386	Bw	3.4	Westphalian	Europe
36	JN398388	Bw	3.2	Maremmano	Europe
37	MG001436	Bw	5.1	Yanqi horse	East Asia
38	HQ439469	Bw	3.5	Kinsky horse	Europe
39	JN398390	Bw	2.8	Unspecified Italian Breed	Europe
40	KC202958	Bw	2.8	Thoroughbred	Europe
41	KT368733	Bw	1.3	Yakutian	West Asia
42	KT368735	Bw	1.3	Yakutian	West Asia
43	KT368727	Bw	1.3	Yakutian	West Asia
44	KT368734	Bw	1.3	Yakutian	West Asia
45	KT368729	Bw	2.4	Yakutian	West Asia
46	JQ340154	Bw	4.6	Unspecified Breed	East Asia
47	JQ340126	Bw	3.8	Unspecified Breed	East Asia
48	HQ439486	Bw	3.9	Russian Riding Horse	West Asia
49	HQ439474	Bw	3.5	Kuznet	Europe
50	AP013090	Bw	3.5	Japan's horse	East Asia
51	JN398391	Bw	5.5	Unspecified Syrian Breed	West Asia
52	KT368726	Cw	1.5	Ancient	ancient
53	JQ340113	Cw	3.3	Unspecified Breed	East Asia
54	JN398393	Cw	3.9	Akhal-Teke	West Asia
55	JQ340118	Cw	4.2	Unspecified Breed	East Asia
56	JN398392	Cw	2.6	Arabian	West Asia
57	MG001430	Cw	3.2	Yingjiang horse	East Asia
58	MG001429	Cw	2.6	Yili horse	East Asia
59	MG001427	Cw	3.2	Tengchong horse	East Asia
60	GU734779	Cw	3.3	Unspecified Breed	East Asia
61	JQ340125	Cw	4	Unspecified Breed	East Asia
62	MG001426	Cw	1.8	Chakouyi horse	East Asia
63	JN398395	Cw	3.3	Unspecified Iranian Breed	West Asia
64	JN398394	Cw	3.3	Unspecified Syrian Breed	West Asia
65	HQ439471	Cw	1.5	Kladruber	Europe
66	HQ439449	Cw	1.8	Arab	West Asia
67	JN398396	Cw	5.2	Suffolk Punch	Europe
68	HQ439487	Cw	5.2	Black Forest	Europe
69	JQ340137	Dw	11.9	Unspecified Breed	East Asia
70	JQ340101	Dw	11.9	Unspecified Breed	East Asia
71	JQ340158	Dw	3.2	Unspecified Breed	East Asia
72	JN398399	Dw	2.8	Icelandic Horse	Europe
73	HQ439489	Dw	2.8	Shetland	Europe
74	JN398400	Dw	3.7	Icelandic Horse	Europe
75	JQ340138	Dw	3.9	Unspecified Breed	East Asia
76	JQ340160	Dw	3.9	Unspecified Breed	East Asia
77	KT368736	Dw	4.9	Yakutian	West Asia
78	JQ340150	Dw	3.2	Unspecified Breed	East Asia
79	JQ340146	Dw	3.7	Unspecified Breed	East Asia
80	JN398398	Dw	5.1	Norwegian Fjord	Europe
81	KF038164	Dw	2.5	Jeju	East Asia
82	KF038162	Dw	2.5	Jeju	East Asia
83	JN398401	Ew	2.5	Maremmano	Europe
84	JQ340127	Ew	2.5	Unspecified Breed	East Asia
85	KT985982	Ew	4.5	Unspecified Breed	West Asia
86	MG001428	Ew	7.8	Jinjiang horse	East Asia
87	JQ340108	Ew	5.5	Unspecified Breed	East Asia
88	KT368753	Fw	1.5	Equus przewalskii	West Asia
89	KT368754	Fw	1.5	Equus przewalskii	West Asia
90	KT368746	Fw	2.2	Equus przewalskii	West Asia
91	KT368748	Fw	1.5	Equus przewalskii	West Asia
92	KT368747	Fw	1.5	Equus przewalskii	West Asia
93	JN398402	Fw	1.5	Equus przewalskii	West Asia
94	KT368744	Fw	1.5	Equus przewalskii	West Asia
95	AP013095	Fw	1.5	Equus przewalskii	West Asia
96	KT368745	Fw	2.6	Equus przewalskii	West Asia
97	JN398403	Fw	1.5	Przewalskii	West Asia
98	HQ439443	Gw	4	Altai	West Asia
99	JQ340091	Gw	5.3	Unspecified Breed	East Asia
100	KT368758	Gw	2	Equus przewalskii	West Asia
101	JN398405	Gw	2	Unspecified Iranian Breed	West Asia
102	JQ340147	Gw	3.7	Unspecified Breed	East Asia
103	JQ340157	Gw	3.7	Unspecified Breed	East Asia
104	JN398404	Gw	3.8	Akhal-Teke	West Asia
105	KT368741	Gw	3.5	Mongolian_horse	West Asia
106	JN398406	Gw	3.7	Arabian	West Asia
107	EF597513	Gw	3.6	Naqu horse	East Asia
108	JQ340103	Gw	3.6	Unspecified Breed	East Asia
109	JN398407	Gw	3.6	Giara Horse (Sardinia)	Europe
110	MG001444	Gw	5.1	Chakouyi horse	East Asia
111	HQ439472	Gw	3.6	Kladruber	Europe
112	HQ439468	Gw	3.5	Kabardin	Europe
113	JQ340159	Gw	3.4	Unspecified Breed	East Asia
114	HQ439481	Gw	4.2	Orlov Trotter	Europe
115	HQ439454	Gw	3.4	Camargue	Europe
116	MG001431	Gw	2.1	Jinjiang horse	East Asia
117	JN398408	Gw	2.1	Unspecified Syrian Breed	West Asia
118	KC202965	Gw	2.6	Thoroughbred	Europe
119	KC202963	Gw	2.6	Thoroughbred	Europe
120	KC202967	Gw	3.5	Thoroughbred	Europe
121	KC202966	Gw	4.2	Thoroughbred	Europe
122	KC202964	Gw	2.1	Thoroughbred	Europe
123	KC202962	Gw	2.1	Thoroughbred	Europe
124	KC202960	Gw	4.8	Thoroughbred	Europe
125	AP013081	Gw	3.7	Japan's horse	East Asia
126	KT596764	Gw	3.5	Hequ horse	East Asia
127	JN398409	Gw	3.5	Unspecified Italian Breed	Europe
128	AP013083	Gw	1.8	Japan's horse	East Asia
129	AP013099	Gw	1.8	Japan's horse	East Asia
130	AP013085	Gw	2.9	Japan's horse	East Asia
131	AP013086	Gw	3.5	Japan's horse	East Asia
132	AP013096	Gw	2.1	Japan's horse	East Asia
133	AP013097	Gw	2.1	Japan's horse	East Asia
134	JN398411	Gw	6.2	Giara Horse (Sardinia)	Europe
135	JN398410	Gw	3.6	Akhal-Teke	West Asia
136	JN398412	Gw	4	Arabian	West Asia
137	JQ340117	Hw	4	Unspecified Breed	East Asia
138	GU734774	Hw	3.8	Unspecified Breed	East Asia
139	JQ340130	Hw	3.8	Unspecified Breed	East Asia
140	MG001442	Hw	3.7	Yanqi horse	East Asia
141	JN398413	Hw	4	Maremmano	Europe
142	MG001440	Hw	2.6	Zhaotong horse	East Asia
143	MG001441	Hw	2.6	Yimen horse	East Asia
144	KC202968	Hw	3.7	Thoroughbred	East Asia
145	AP013100	Iw	3.4	Japan's horse	East Asia
146	AP013088	Iw	3.4	Japan's horse	East Asia
147	AP013094	Iw	1.2	Japan's horse	East Asia
148	HQ439476	Iw	3.7	Kustanai	West Asia
149	JN398416	Iw	2.9	Caspian Pony	West Asia
150	JQ340136	Iw	2.9	Unspecified Breed	East Asia
151	KT368730	Iw	3.4	Yakutian	West Asia
152	KT368742	Iw	1.2	Equus przewalskii	West Asia
153	KT368743	Iw	1.6	Equus przewalskii	West Asia
154	KC202970	Iw	2.1	Thoroughbred	Europe
155	JN398417	Iw	1.9	Trakhener	Europe
156	KC202969	Iw	1.9	Thoroughbred	Europe
157	KC202982	Iw	2.1	Thoroughbred	Europe
158	JQ340097	Iw	3.2	Unspecified Breed	East Asia
159	KC202979	Iw	3.8	Unspecified Breed	Europe
160	KC202977	Iw	3.8	Thoroughbred	Europe
161	KC202980	Iw	2.2	Thoroughbred	Europe
162	KC202975	Iw	2.3	Thoroughbred	Europe
163	KC202981	Iw	3	Thoroughbred	Europe
164	KC202976	Iw	2.3	Thoroughbred	Europe
165	KC202978	Iw	3.8	Thoroughbred	Europe
166	KC202974	Iw	2.4	Thoroughbred	Europe
167	KC202973	Iw	2.4	Thoroughbred	Europe
168	KC202984	Iw	2.2	Thoroughbred	Europe
169	KC202972	Iw	2.2	Thoroughbred	East Asia
170	KC202971	Iw	2.2	Thoroughbred	East Asia
171	HQ439499	Iw	3.8	Welsh Pony	Europe
172	HQ439497	Iw	3.6	Welsh Pony	Europe
173	KF038161	Iw	5.5	Jeju	East Asia
174	KT368728	Iw	3.9	Yakutian	Europe
175	HQ439496	Iw	3.6	Welsh Pony	Europe
176	HQ439463	Iw	3.9	Norwegian Fjord	Europe
177	HQ439480	Iw	8.1	Noriker	Europe
178	JN398415	Iw	4.3	Unspecified Iranian Breed	West Asia
179	JN398414	Iw	3.7	Unspecified Iranian Breed	West Asia
180	KF038163	Jw	4.4	Jeju	East Asia
181	JQ340106	Jw	3.5	Unspecified Breed	East Asia
182	JQ340093	Jw	3.7	Unspecified Breed	East Asia
183	MG001417	Jw	2.6	Baise horse	East Asia
184	MG001446	Jw	2.6	Tengchong horse	East Asia
185	JQ340139	Jw	4.4	Unspecified Breed	East Asia
186	MG001443	Jw	3.2	Debao horse	East Asia
187	KT368737	Jw	3.2	Yakutian	West Asia
188	JN398418	Jw	3.9	Maremmano	Europe
189	JN398419	Jw	13.1	Unspecified Iranian Breed	West Asia
190	JN398420	Kw	31.1	Belgian Draft	Europe
191	KT368752	JK	2.1	Equus przewalskii	West Asia
192	KT368749	JK	1.3	Equus przewalskii	West Asia
193	KT368750	JK	1.3	Equus przewalskii	West Asia
194	AP013079	Lw	3.5	Unspecified Breed	East Asia
195	AP013091	Lw	4	Unspecified Breed	East Asia
196	MG001434	Lw	4.4	Yili horse	East Asia
197	HQ439483	Lw	4	Percheron	Europe
198	HQ439482	Lw	3.2	Paint Horse	Europe
199	HQ439451	Lw	4.4	Bashkir Curly	Europe
200	HQ439446	Lw	4.4	Appaloosa	Europe
201	JQ340109	Lw	3.9	Unspecified Breed	East Asia
202	GU734780	Lw	4.6	Unspecified Breed	East Asia
203	JQ340145	Lw	3.5	Unspecified Breed	East Asia
204	JQ340100	Lw	3.2	Unspecified Breed	East Asia
205	HQ439498	Lw	3.2	Welsh Pony	Europe
206	HQ439494	Lw	1.2	Hungarian Coldblood	Europe
207	MG001433	Lw	3.3	Jinjiang horse	East Asia
208	HQ439493	Lw	3.3	Trakehner	Europe
209	HQ439492	Lw	3.5	Spotted horse	Europe
210	HQ439452	Lw	3.4	Bashkir Curly	Europe
211	KC203001	Lw	3	Thoroughbred	Europe
212	KC203005	Lw	2.3	Thoroughbred	Europe
213	KC202996	Lw	2.3	Thoroughbred	Europe
214	KC203003	Lw	2.7	Thoroughbred	Europe
215	KC203012	Lw	2.9	Thoroughbred	Europe
216	KC202987	Lw	2.9	Thoroughbred	Europe
217	KC202999	Lw	2.7	Thoroughbred	Europe
218	KC203017	Lw	2.6	Thoroughbred	Europe
219	KC202988	Lw	3.2	Thoroughbred	Europe
220	KC202994	Lw	4.1	Thoroughbred	Europe
221	KC203008	Lw	1.9	Thoroughbred	Europe
222	KC203006	Lw	2.7	Thoroughbred	Europe
223	KC203018	Lw	1.7	Thoroughbred	Europe
224	KC203009	Lw	1.7	Thoroughbred	Europe
225	KC202995	Lw	3.4	Thoroughbred	Europe
226	KC203014	Lw	2.7	Thoroughbred	Europe
227	KC202998	Lw	3.1	Thoroughbred	Europe
228	KC203021	Lw	3.5	Thoroughbred	Europe
229	KC202990	Lw	2.7	Thoroughbred	Europe
230	KC203010	Lw	3.2	Thoroughbred	Europe
231	KC203004	Lw	2.7	Thoroughbred	Europe
232	KC202989	Lw	3.5	Thoroughbred	Europe
233	KC203020	Lw	3	Thoroughbred	Europe
234	KC202985	Lw	2.7	Thoroughbred	Europe
235	KC202986	Lw	2.3	Thoroughbred	Europe
236	KC202992	Lw	3.8	Thoroughbred	Europe
237	KC203016	Lw	2.3	Thoroughbred	Europe
238	HQ439453	Lw	4.4	Thoroughbred	Europe
239	KC203002	Lw	3.3	Thoroughbred	Europe
240	KC202991	Lw	3.2	Thoroughbred	Europe
241	KC203007	Lw	2.6	Thoroughbred	Europe
242	HQ439470	Lw	1.9	Kinsky horse	Europe
243	HQ439461	Lw	5.1	German Riding Pony	Europe
244	JQ340105	Lw	3.2	Unspecified Breed	East Asia
245	JQ340165	Lw	3.6	Unspecified Breed	East Asia
246	JQ340111	Lw	3.6	Unspecified Breed	East Asia
247	MG001425	Lw	3.4	Tengchong horse	East Asia
248	JQ340133	Lw	4.2	Unspecified Breed	East Asia
249	MG001415	Lw	2.2	Tengchong horse	East Asia
250	MG001424	Lw	2.2	Yunnan horse	East Asia
251	JN398424	Lw	4.4	Akhal-Teke	West Asia
252	JN398423	Lw	3.5	Unspecified Iranian Breed	West Asia
253	JN398422	Lw	3.5	Akhal-Teke	West Asia
254	JN398421	Lw	4	American Paint Horse	Europe
255	JN398430	Lw	3.5	Andalusian	Europe
256	JN398429	Lw	2.7	Oldenburg	Europe
257	JN398427	Lw	4.2	Maremmano	Europe
258	JN398428	Lw	4.7	Caspian Pony	West Asia
259	JN398426	Lw	1.2	Maremmano	Europe
260	JN398433	Lw	3.5	Unspecified Iranian Breed	West Asia
261	JN398434	Lw	4.5	Arabian	West Asia
262	JN398432	Lw	4.5	Maremmano	Europe
263	JN398431	Lw	8	Silesian	Europe
264	JN398425	Lw	3.2	Unspecified Italian Breed	Europe
265	JQ340095	Lw	5.8	Unspecified Breed	East Asia
266	KC202997	Lw	12.8	Thoroughbred	Europe
267	HQ439478	Lw	4.5	Liebenthaler	Europe
268	KC203000	Lw	12.8	Thoroughbred	Europe
269	AP013098	Mw	5.6	Japan's horse	East Asia
270	AP013092	Mw	3.3	Japan's horse	East Asia
271	JQ340120	Mw	4.7	Unspecified Breed	East Asia
272	HQ439442	Mw	3.2	Akhal-Teke	West Asia
273	MG001447	Mw	3.3	Baise horse	East Asia
274	GU734781	Mw	3.6	Unspecified Breed	East Asia
275	MG001448	Mw	3.6	Yimen horse	East Asia
276	JQ340107	Mw	3.6	Unspecified Breed	East Asia
277	HQ439455	Mw	3.2	Clydesdale	Europe
278	KC203022	Mw	4	Thoroughbred	Europe
279	KC203025	Mw	2.5	Thoroughbred	Europe
280	KC203023	Mw	1.6	Thoroughbred	Europe
281	KC203026	Mw	1.6	Thoroughbred	Europe
282	KC203027	Mw	4	Thoroughbred	Europe
283	KC203024	Mw	3.5	Thoroughbred	Europe
284	JN398436	Mw	3.5	Caspian Pony	West Asia
285	JN398437	Mw	3.7	Maremmano	Europe
286	JN398435	Mw	3.6	Akhal-Teke	West Asia
287	JN398439	Mw	3.5	Clydesdale	Europe
288	JN398438	Mw	3.7	Friesian	Europe
289	HQ439466	Mw	2.8	Icelandic horse	Europe
290	HQ439495	Mw	2.8	breed Viatka	Europe
291	HQ439464	Nw	4.1	Haflinger	Europe
292	JQ340140	Nw	3.1	Unspecified Breed	East Asia
293	JQ340134	Nw	3.1	Unspecified Breed	East Asia
294	MG001439	Nw	5.5	Changdu horse	East Asia
295	JN398444	Nw	2.2	Unspecified Iranian Breed	West Asia
296	JN398417	Nw	2.2	Trakhener	Europe
297	KC203029	Nw	2	Thoroughbred	Europe
298	KC203031	Nw	2	Unspecified Breed	Europe
299	KC203030	Nw	2.8	Unspecified Breed	Europe
300	JN398443	Nw	2.2	Andalusian	Europe
301	JN398441	Nw	3	Saddlebred	Europe
302	JN398440	Nw	3	English Shire	Europe
303	HQ439467	Ow	4.3	Yakut	West Asia
304	KF038159	Ow	4.9	Unspecified Breed	East Asia
305	AP013089	Ow	4.1	Japan's horse	East Asia
306	AP013093	Ow	4.1	Unspecified Breed	East Asia
307	JN398445	Ow	4.3	Unspecified Iranian Breed	West Asia
308	JN398447	Ow	3.7	Caspian Pony	West Asia
309	JN398446	Ow	3.7	Unspecified Iranian Breed	West Asia
310	JN398448	Ow	6.1	Arabian	West Asia
311	JQ340123	Pw	4	Unspecified Breed	East Asia
312	JQ340131	Pw	3.8	Unspecified Breed	East Asia
313	GU734778	Pw	4.6	Unspecified Breed	East Asia
314	MG001413	Pw	3.3	Lijiang horse	East Asia
315	GU734782	Pw	3.5	Unspecified Breed	East Asia
316	HQ439500	Pw	3.5	Vladimir Heavy Draught	Europe
317	HQ439447	Pw	3.3	Arab	West Asia
318	HQ439445	Pw	3.3	Kladruber	Europe
319	HQ439444	Pw	4.1	Altai	West Asia
320	JQ340104	Qw	3.9	Unspecified Breed	East Asia
321	JQ340141	Qw	3.9	Unspecified Breed	East Asia
322	MG001418	Qw	3.6	Lijiang horse	East Asia
323	MG001419	Qw	4	Yingjiang horse	East Asia
324	JQ340163	Qw	3.6	Unspecified Breed	East Asia
325	KT368732	Qw	3.6	Yakutian	West Asia
326	JQ340152	Qw	3.4	Unspecified Breed	East Asia
327	MG001414	Qw	3.4	Yimen horse	East Asia
328	MG001420	Qw	4.3	Yili horse	East Asia
329	JQ340155	Qw	3.6	Unspecified Breed	East Asia
330	MG001421	Qw	3.6	Yanqi horse	East Asia
331	HQ439477	Qw	3.1	Lewitzer	Europe
332	HQ439465	Qw	3.1	Icelandic horse	Europe
333	HQ439448	Qw	5.8	Arab	West Asia
334	JQ340135	Qw	2.2	Unspecified Breed	East Asia
335	HQ439450	Qw	5.1	Ardennais	Europe
336	JQ340124	Qw	3.7	Unspecified Breed	East Asia
337	JN398449	Qw	3.6	Akhal-Teke	West Asia
338	JN398450	Qw	5.6	Akhal-Teke	West Asia
339	JN398454	Qw	3.7	Maremmano	Europe
340	JN398455	Qw	4.3	Unspecified Iranian Breed	West Asia
341	JN398453	Qw	2.2	Akhal-Teke	West Asia
342	JN398452	Qw	3.3	Akhal-Teke	West Asia
343	JN398451	Qw	3.3	Unspecified Iranian Breed	West Asia
344	AP013078	Rw	3.5	Unspecified Breed	East Asia
345	JQ340122	Rw	3.7	Unspecified Breed	East Asia
346	JN398457	Rw	3.7	Unspecified Iranian Breed	West Asia
347	JN398456	Rw	3.5	Maremmano	Europe
348	FJ718996	Rw	6.7	Unspecified Breed	East Asia
349	X97337	outgroup		Tibet donkey	East Asia
