# Supplementary material for: Some maternal lineages of domestic horses may have origins in East Asia revealed with further evidence of mitochondrial genomes and HVR-1 sequences
Source: PeerJ. 2018 Jun 1;6:e4896. doi: 10.7717/peerj.4896 (PMC5985762; doi:10.7717/peerj.4896)
Supplement: Table S4 [file peerj-06-4896-s004.xlsx]

## Sheet: Sheet1
Common sequence	Whole mtDNA sequence	HVR-1
AP013080	Aw	A4
AP013101	Aw	A4
JN398377	Aw	A4
JQ340149	Aw	A4
X79547	Aw	A4
AP013102	Aw	A5
FJ718998	Aw	A5
HQ439441	Aw	A5
HQ439475	Aw	A5
JN398378	Aw	A5
JN398379	Aw	A5
JN398381	Aw	A5
JN398382	Aw	A5
JQ340116	Aw	A5
JQ340161	Aw	A5
KC202956	Aw	A5
KC202957	Aw	A5
MG001416	Aw	A5
MG001435	Aw	A5
JN398385	Aw	A6
KT368738	Aw	A6
AP013084	Aw	A5
HQ439491	Aw	A4
JN398380	Aw	A5
JN398383	Aw	A6
JN398384	Aw	A6
JQ340110	Aw	A6
MG001432	Aw	A6
KT368757	A-K(Aw)	A6
AP013090	Bw	A3
HQ439469	Bw	A3
HQ439474	Bw	A3
HQ439486	Bw	A3
JN398386	Bw	A3
JN398387	Bw	A3
JN398388	Bw	A3
JN398390	Bw	A3
JQ340096	Bw	A3
JQ340126	Bw	A3
JQ340154	Bw	A3
KC202958	Bw	A3
KC202959	Bw	A3
KT368727	Bw	A3
KT368729	Bw	A3
KT368733	Bw	A3
KT368734	Bw	A3
KT368735	Bw	A3
MG001436	Bw	A3
JN398391	Bw	A3
KT368726	Cw	A6
HQ439449	Cw	A6
HQ439471	Cw	A6
HQ439487	Cw	A6
JN398393	Cw	A6
JN398394	Cw	A6
JN398395	Cw	A6
JN398396	Cw	A6
JQ340125	Cw	A6
MG001426	Cw	A6
GU734779	Cw	A6
JN398392	Cw	H
JQ340113	Cw	H
JQ340118	Cw	H
MG001427	Cw	H
MG001429	Cw	H
MG001430	Cw	H
KT368736	Dw	E
HQ439489	Dw	E
JN398400	Dw	E
JQ340138	Dw	E
JQ340146	Dw	E
JQ340150	Dw	E
JQ340158	Dw	E
JQ340160	Dw	E
KF038162	Dw	E
JN398398	Dw	E
JN398399	Dw	E
JQ340101	Dw	E
JQ340137	Dw	E
KF038164	Dw	E
JN398401	Ew	A7
JQ340108	Ew	A7
JQ340127	Ew	A7
MG001428	Ew	A7
KT985982	Ew	A7
AP013095	Fw	A2
JN398402	Fw	A2
JN398403	Fw	A2
KT368744	Fw	A2
KT368745	Fw	A2
KT368746	Fw	A2
KT368747	Fw	A2
KT368748	Fw	A2
KT368753	Fw	A2
KT368754	Fw	A2
AP013086	Gw	A1
JQ340159	Gw	A1
KT368741	Gw	A1
KT596764	Gw	A1
AP013081	Gw	A1
AP013083	Gw	A1
AP013085	Gw	A1
AP013096	Gw	A1
AP013097	Gw	A1
AP013099	Gw	A1
EF597513	Gw	A1
HQ439443	Gw	A1
HQ439454	Gw	A1
HQ439468	Gw	A1
HQ439481	Gw	A1
JN398404	Gw	A1
JN398405	Gw	A1
JN398407	Gw	A1
JN398408	Gw	A1
JN398409	Gw	A1
JN398410	Gw	A1
JN398411	Gw	A1
JN398412	Gw	A1
JQ340103	Gw	A1
JQ340147	Gw	A1
KC202963	Gw	A1
KC202965	Gw	A1
KC202966	Gw	A1
KC202967	Gw	A1
KT368758	Gw	A1
MG001431	Gw	A1
MG001444	Gw	A1
KC202960	Gw	A1
KC202964	Gw	A1
HQ439472	Gw	A1
JN398406	Gw	A1
JQ340091	Gw	A1
JQ340157	Gw	A1
KC202962	Gw	A1
JQ340117	Hw	D5
MG001440	Hw	D5
MG001441	Hw	D5
KC202968	Hw	D6
JN398413	Hw	D6
JQ340130	Hw	D6
GU734774	Hw	D6
MG001442	Hw	D6
KC202973	Iw	B1
KC202975	Iw	B1
KC202978	Iw	B1
KC202981	Iw	B1
KT368728	Iw	B1
HQ439463	Iw	B1
HQ439496	Iw	B1
KC202974	Iw	B1
KC202976	Iw	B1
AP013094	Iw	B2
JN398415	Iw	B2
KC202971	Iw	B2
KC202972	Iw	B2
AP013088	Iw	B2
AP013100	Iw	B2
HQ439476	Iw	B2
HQ439480	Iw	B2
HQ439497	Iw	B2
HQ439499	Iw	B2
JN398414	Iw	B2
JN398416	Iw	B2
JQ340136	Iw	B2
KF038161	Iw	B2
KT368730	Iw	B2
KT368742	Iw	B2
KT368743	Iw	B2
JN398417	Iw	B3
KC202970	Iw	B3
KC202977	Iw	B3
KC202980	Iw	B3
KC202982	Iw	B3
JQ340097	Iw	B3
KC202969	Iw	B3
KC202979	Iw	B3
KC202984	Iw	B3
KT368749(Pre)	JK	A6
KT368750(Pre)	JK	A6
KT368752(Pre)	JK	A6
JQ340106	Jw	I
JQ340093	Jw	I
JQ340139	Jw	I
KF038163	Jw	I
MG001417	Jw	I
MG001443	Jw	I
MG001446	Jw	I
JN398418	Jw	I
KT368737(Yakut)	Jw	H
JN398419	Jw	I
JN398420	Kw	I
HQ439446	Lw	D1
HQ439451	Lw	D1
HQ439482	Lw	D1
HQ439483	Lw	D1
HQ439498	Lw	D1
JN398421	Lw	D1
JN398422	Lw	D1
JN398423	Lw	D1
JN398425	Lw	D1
JQ340100	Lw	D1
JQ340109	Lw	D1
KC203002	Lw	D1
KC202994	Lw	D2
KC203017	Lw	D2
AP013079	Lw	D2
AP013091	Lw	D2
HQ439452	Lw	D2
HQ439461	Lw	D2
HQ439470	Lw	D2
JN398427	Lw	D2
JN398428	Lw	D2
JN398429	Lw	D2
KC202988	Lw	D2
KC202991	Lw	D2
KC203006	Lw	D2
KC203008	Lw	D2
KC203009	Lw	D2
KC203018	Lw	D2
MG001433	Lw	D2
KC202987	Lw	D3
KC202992	Lw	D3
KC203000	Lw	D3
KC203003	Lw	D3
KC203004	Lw	D3
KC203005	Lw	D3
HQ439453	Lw	D3
HQ439478	Lw	D3
JN398424	Lw	D3
JN398434	Lw	D3
JQ340095	Lw	D3
JQ340111	Lw	D3
KC202985	Lw	D3
KC202986	Lw	D3
KC202989	Lw	D3
KC202996	Lw	D3
KC202997	Lw	D3
KC202999	Lw	D3
KC203001	Lw	D3
KC203012	Lw	D3
KC203016	Lw	D3
KC203020	Lw	D3
MG001415	Lw	D3
MG001424	Lw	D3
MG001425	Lw	D3
MG001434	Lw	D3
JQ340105	Lw	D2
GU734780	Lw	D1
HQ439492	Lw	D2
HQ439493	Lw	D2
HQ439494	Lw	D2
JN398426	Lw	D2
JN398430	Lw	D2
JN398431	Lw	D2
JN398432	Lw	D3
JN398433	Lw	D3
JQ340133	Lw	D3
JQ340145	Lw	D2
JQ340165	Lw	D3
KC202990	Lw	D3
KC202995	Lw	D3
KC202998	Lw	D3
KC203007	Lw	D2
KC203010	Lw	D3
KC203014	Lw	D3
KC203021	Lw	D3
GU734781	Mw	C1
HQ439442	Mw	C1
HQ439455	Mw	C1
HQ439466	Mw	C1
HQ439495	Mw	C1
JN398435	Mw	C1
JN398436	Mw	C1
JN398438	Mw	C1
JN398439	Mw	C1
JQ340107	Mw	C1
JQ340120	Mw	C1
KC203023	Mw	C1
KC203024	Mw	C1
KC203025	Mw	C1
KC203026	Mw	C1
KC203027	Mw	C1
MG001447	Mw	C1
MG001448	Mw	C1
AP013092	Mw	C1
AP013098	Mw	C1
JN398437	Mw	C1
KC203022	Mw	C1
JN398440	Nw	C2
JN398443	Nw	C2
JN398444	Nw	C2
JQ340134	Nw	C2
JQ340140	Nw	C2
KC203029	Nw	C2
KC203030	Nw	C2
KC203031	Nw	C2
MG001439	Nw	C2
HQ439464	Nw	C2
JN398441	Nw	C2
AP013089	Ow	F1
AP013093	Ow	F1
JN398448	Ow	F1
KF038159	Ow	F3
HQ439467	Ow	F1
JN398445	Ow	F1
JN398446	Ow	F1
JN398447	Ow	F1
GU734778	Pw	F1
GU734782	Pw	F1
HQ439444	Pw	F1
HQ439445	Pw	F1
HQ439447	Pw	F1
HQ439500	Pw	F1
JQ340131	Pw	F1
MG001413	Pw	F1
JQ340123	Pw	F1
HQ439465	Qw	F2
HQ439477	Qw	F2
JQ340155	Qw	F2
MG001421	Qw	F2
HQ439450	Qw	F3
JN398454	Qw	F3
JN398455	Qw	F3
JQ340163	Qw	F3
MG001418	Qw	F3
MG001419	Qw	F3
HQ439448	Qw	F2
JN398449	Qw	F2
JN398450	Qw	F2
JN398451	Qw	F2
JN398452	Qw	F2
JN398453	Qw	F3
JQ340104	Qw	F3
JQ340124	Qw	F3
JQ340135	Qw	F3
JQ340141	Qw	F3
JQ340152	Qw	F2
KT368732	Qw	F1
MG001414	Qw	F2
MG001420	Qw	F2
KT368725	A-K(Qw)	F3
KT368723	A-K(Qw)	F3
JN398456	Rw	G1
JN398457	Rw	G1
JQ340122	Rw	G1
FJ718996	Rw	G1
AP013078	Rw	G1
