# Supplementary material for: Some maternal lineages of domestic horses may have origins in East Asia revealed with further evidence of mitochondrial genomes and HVR-1 sequences
Source: PeerJ. 2018 Jun 1;6:e4896. doi: 10.7717/peerj.4896 (PMC5985762; doi:10.7717/peerj.4896)
Supplement: Table S5 [file peerj-06-4896-s005.xlsx]

## Sheet: Sheet1
Serial Number	NCBI number	Haplotype	Hapgroup	Breed	Geography
1	KP731351	111	A1	Lipizzan	Europe
2	KU711268	111	A1	Maremmano	Europe
3	KU711281	111	A1	Maremmano	Europe
4	KU711497	111	A1	Tolfetano	Europe
5	KU711498	111	A1	Tolfetano	Europe
6	AF466012	111	A1	Potoka	Europe
7	AY057418	111	A1	Lipizzan	Europe
8	AY519926	111	A1	Losino	Europe
9	AY519932	111	A1	Losino	Europe
10	AY805643	111	A1	Lusitano	Europe
11	HM484169	111	A1	west asia unspecified horse	West Asia
12	EU433717	112	A1	East asia unspecified horse	East Asia
13	HM484170	112	A1	Weat asia unspecified horse	West Asia
14	JQ340157	112	A1	East asia unspecified horse	East Asia
15	HM484025	113	A1	west asia unspecified horse	West Asia
16	JQ360699	113	A1	East asia unspecified horse	East Asia
17	KT808311	113	A1	Russia unspecial breed	West Asia
18	KU711088	113	A1	Arabian horse	West Asia
19	EF433397	114	A1	Skyros	Europe
20	JQ520270	114	A1	Eastern Europe unspecified horse	Europe
21	JQ520271	114	A1	Eastern Europe unspecified horse	Europe
22	JQ520282	114	A1	Eastern Europe unspecified horse	Europe
23	JQ520320	114	A1	Eastern Europe unspecified horse	Europe
24	KP731329	114	A1	Lipizzan	Europe
25	KP731330	114	A1	Lipizzan	Europe
26	KP731331	114	A1	Lipizzan	Europe
27	KP731332	114	A1	Lipizzan	Europe
28	AB329596	114	A1	Hokkaido native horse	East Asia
29	AP013081	114	A1	Japanese Unspecified Breed	East Asia
30	AP013082	114	A1	Japanese Unspecified Breed	East Asia
31	AP013083	114	A1	Japanese Unspecified Breed	East Asia
32	AP013085	114	A1	Japanese Unspecified Breed	East Asia
33	AP013086	114	A1	Japanese Unspecified Breed	East Asia
34	AP013096	114	A1	Japanese Unspecified Breed	East Asia
35	AP013097	114	A1	Japanese Unspecified Breed	East Asia
36	AP013099	114	A1	Japanese Unspecified Breed	East Asia
37	DQ297638	114	A1	China xinihe horse	East Asia
38	DQ986470	114	A1	China Tiben horse	East Asia
39	EU203842	114	A1	Naqu horse	East Asia
40	EU203857	114	A1	Naqu horse	East Asia
41	EU433729	114	A1	Asia unspecified horse	East Asia
42	EU931603	114	A1	Ancient horse	ancient
43	GU561999	114	A1	Mongolian horse	East Asia
44	MG001431	114	A1	Asia unspecified horse	East Asia
45	JN224843	114	A1	Mongolian horse	East Asia
46	JN790902	114	A1	Mongolian horse	East Asia
47	JQ340144	114	A1	Asia unspecified horse	East Asia
48	JQ360789	114	A1	Asia unspecified horse	East Asia
49	KT167196	114	A1	Asia unspecified horse	East Asia
50	KT211060	114	A1	kazakh	East Asia
51	KT211183	114	A1	Yanqi	East Asia
52	KT211189	114	A1	Thengchong	East Asia
53	KU711086	114	A1	Umbria	West Asia
54	KU711106	114	A1	Calabria	West Asia
55	AY462427	114	A1	Giara	Europe
56	AY462429	114	A1	Giara	Europe
57	JF804123	114	A1	Italian unspecified breed	Europe
58	JF804124	114	A1	Italian unspecified breed	Europe
59	JN398409	114	A1	Unspecified Italian Breed	Europe
60	JN398411	114	A1	Giara Horse (Sardinia)	Europe
61	KF192383	114	A1	Italian unspecified breed	Europe
62	KF192389	114	A1	Italian unspecified breed	Europe
63	KF192390	114	A1	Italian unspecified breed	Europe
64	KF192391	114	A1	Italian unspecified breed	Europe
65	KR013116	114	A1	Italian unspecified breed	Europe
66	KU601739	114	A1	South Europe unspecified horse	Europe
67	KU601741	114	A1	South Europe unspecified horse	Europe
68	KU601742	114	A1	South Europe unspecified horse	Europe
69	KU711127	114	A1	Bardigiano	Europe
70	KU711227	114	A1	Giara	Europe
71	KU711269	114	A1	Maremmano	Europe
72	KU711278	114	A1	Maremmano	Europe
73	KU711312	114	A1	Maremmano	Europe
74	KU711317	114	A1	Maremmano	Europe
75	KU711399	114	A1	Sarcidano	Europe
76	KU711403	114	A1	Sarcidano	Europe
77	KU711407	114	A1	Sarcidano	Europe
78	KU711409	114	A1	Sarcidano	Europe
79	KU711418	114	A1	Sarcidano	Europe
80	KU711429	114	A1	Sardinian Anglo-Arab	Europe
81	KU711430	114	A1	Sardinian Anglo-Arab	Europe
82	KU711432	114	A1	Sardinian Anglo-Arab	Europe
83	KU711433	114	A1	Sardinian Anglo-Arab	Europe
84	KU711434	114	A1	Sardinian Anglo-Arab	Europe
85	KU711436	114	A1	Sardinian Anglo-Arab	Europe
86	KU711437	114	A1	Sardinian Anglo-Arab	Europe
87	KU711438	114	A1	Sardinian Anglo-Arab	Europe
88	EU433841	114	A1	India native horse	East Asia
89	HE565684	114	A1	India native horse	East Asia
90	HE565685	114	A1	India native horse	East Asia
91	HE565686	114	A1	India native horse	East Asia
92	HE565694	114	A1	India native horse	East Asia
93	HE565886	114	A1	India native horse	East Asia
94	HE572594	114	A1	South Asia unspecified horse	East Asia
95	HE572601	114	A1	South Asia unspecified horse	East Asia
96	HE572619	114	A1	South Asia unspecified horse	East Asia
97	HE580451	114	A1	South Asia unspecified horse	East Asia
98	HE580457	114	A1	South Asia unspecified horse	East Asia
99	AF481334	114	A1	Tuva	West Asia
100	JQ936433	114	A1	Eurasian unspecified horse	West Asia
101	JQ936436	114	A1	Eurasian unspecified horse	West Asia
102	JQ936443	114	A1	Eurasian unspecified horse	West Asia
103	JQ936448	114	A1	Eurasian unspecified horse	West Asia
104	AF168695	114	A1	Lipizzan breed	Europe
105	AF447764	114	A1	Sorraia	Europe
106	AJ413901	114	A1	Sorraia	Europe
107	AJ413902	114	A1	Sorraia	Europe
108	AJ413903	114	A1	Sorraia	Europe
109	AJ413910	114	A1	Sorraia	Europe
110	AJ413911	114	A1	Sorraia	Europe
111	AJ413912	114	A1	Sorraia	Europe
112	AJ413913	114	A1	Sorraia	Europe
113	AJ413914	114	A1	Sorraia	Europe
114	AJ413915	114	A1	Sorraia	Europe
115	AJ413916	114	A1	Sorraia	Europe
116	AJ413918	114	A1	Sorraia	Europe
117	AY246259	114	A1	Sorraia	Europe
118	AY246260	114	A1	Sorraia	Europe
119	AY246264	114	A1	Sorraia	Europe
120	AY246265	114	A1	Sorraia	Europe
121	AY293984	114	A1	Lusitano	Europe
122	AY519871	114	A1	Asturcon	Europe
123	DQ327910	114	A1	Irish Draught	Europe
124	EF014979	114	A1	Hispano-Breton	Europe
125	EU256577	114	A1	Hispano-Breton	Europe
126	HQ827162	114	A1	West Europe unspecified horse	Europe
127	HQ849004	114	A1	West Europe unspecified horse	Europe
128	HQ849005	114	A1	West Europe unspecified horse	Europe
129	HQ849018	114	A1	West Europe unspecified horse	Europe
130	HQ849020	114	A1	West Europe unspecified horse	Europe
131	HQ849021	114	A1	West Europe unspecified horse	Europe
132	HQ849022	114	A1	West Europe unspecified horse	Europe
133	HQ849023	114	A1	West Europe unspecified horse	Europe
134	HQ849024	114	A1	West Europe unspecified horse	Europe
135	HQ849025	114	A1	West Europe unspecified horse	Europe
136	HQ849026	114	A1	West Europe unspecified horse	Europe
137	HQ849027	114	A1	West Europe unspecified horse	Europe
138	HQ849028	114	A1	West Europe unspecified horse	Europe
139	HQ849029	114	A1	West Europe unspecified horse	Europe
140	HQ849031	114	A1	West Europe unspecified horse	Europe
141	HQ849032	114	A1	West Europe unspecified horse	Europe
142	HQ849033	114	A1	West Europe unspecified horse	Europe
143	HQ849034	114	A1	West Europe unspecified horse	Europe
144	HQ849035	114	A1	West Europe unspecified horse	Europe
145	HQ849036	114	A1	West Europe unspecified horse	Europe
146	HQ849037	114	A1	West Europe unspecified horse	Europe
147	HQ849038	114	A1	West Europe unspecified horse	Europe
148	HQ849039	114	A1	West Europe unspecified horse	Europe
149	HQ849040	114	A1	West Europe unspecified horse	Europe
150	HQ849041	114	A1	West Europe unspecified horse	Europe
151	HQ849042	114	A1	West Europe unspecified horse	Europe
152	HQ849044	114	A1	West Europe unspecified horse	Europe
153	HQ849045	114	A1	West Europe unspecified horse	Europe
154	JQ229822	114	A1	Spanish native horse	Europe
155	KU711242	114	A1	Monterotondo (Roma, Latium)	Europe
156	KU711258	114	A1	Monterotondo (Roma, Latium)	Europe
157	KU711259	114	A1	Monterotondo (Roma, Latium)	Europe
158	HM483888	114	A1	west asia unspecified horse	West Asia
159	AF132578	114	A1	Arabian	West Asia
160	AF465996	114	A1	Arabian	West Asia
161	AJ413638	114	A1	Arabian	West Asia
162	AY246184	114	A1	Arabian	West Asia
163	EF437564	114	A1	Polish Arabian horses	West Asia
164	JN210970	114	A1	Iranian unspecified breed	West Asia
165	JN398408	114	A1	Unspecified Syrian Breed	West Asia
166	KU569912	114	A1	Middle east unspecified horse	West Asia
167	AJ413708	114	A1	Holsteiner	Europe
168	AJ413834	114	A1	Rhineland Heavy Draft	Europe
169	AJ413849	114	A1	Rhineland Heavy Draft	Europe
170	AY575110	114	A1	Hanovarian	Europe
171	AY575111	114	A1	Holstein	Europe
172	AY575117	114	A1	Lithuanian Heavy Drought	Europe
173	AY575132	114	A1	Trakehner	Europe
174	EU093043	114	A1	Europe ancient horse	ancient
175	EU559575	114	A1	Europe ancient horse	ancient
176	EU559585	114	A1	Europe ancient horse	ancient
177	KC143354	114	A1	Middle Europe unspecified horse	Europe
178	KC147047	114	A1	Middle Europe unspecified horse	Europe
179	KC147050	114	A1	Middle Europe unspecified horse	Europe
180	KC147054	114	A1	Middle Europe unspecified horse	Europe
181	KC147057	114	A1	Middle Europe unspecified horse	Europe
182	KC147058	114	A1	Middle Europe unspecified horse	Europe
183	KC147125	114	A1	Middle Europe unspecified horse	Europe
184	KP212447	114	A1	Middle Europe unspecified horse	Europe
185	KP212457	114	A1	Middle Europe unspecified horse	Europe
186	KP212458	114	A1	Middle Europe unspecified horse	Europe
187	HQ439443	114	A1	Altai	West Asia
188	JN398410	114	A1	Akhal-Teke	West Asia
189	JN790876	115	A1	China Mongolian horse	East Asia
190	JQ360821	115	A1	Asia unspecified horse	East Asia
191	KT167274	115	A1	Asia unspecified horse	East Asia
192	KT211099	115	A1	China unspecified horse	East Asia
193	JF804155	115	A1	Italian unspecified breed	Europe
194	KU711331	115	A1	Maremmano	Europe
195	KU711460	115	A1	Sardinian Anglo-Arab	Europe
196	KU711474	115	A1	Sardinian Anglo-Arab	Europe
197	KU711475	115	A1	Sardinian Anglo-Arab	Europe
198	AB329595	115	A1	Thoroughbred	Europe
199	AF481313	115	A1	Thoroughbred	Europe
200	EU580162	115	A1	thoroughbred	Europe
201	HQ827120	115	A1	West Europe unspecified horse	Europe
202	KC202963	115	A1	West Europe unspecified horse	Europe
203	KC202965	115	A1	West Europe unspecified horse	Europe
204	KC202966	115	A1	West Europe unspecified horse	Europe
205	KC202967	115	A1	West Europe unspecified horse	Europe
206	KJ917256	115	A1	West Europe unspecified horse	Europe
207	KJ917289	115	A1	West Europe unspecified horse	Europe
208	KT757764	115	A1	thoroughbred	Europe
209	KU711234	115	A1	Lipizzan for centre Italy	Europe
210	KU711244	115	A1	Lipizzan for centre Italy	Europe
211	KU711255	115	A1	Lipizzan for centre Italy	Europe
212	AY575134	115	A1	Zemaitukai Heavy Type	Europe
213	AY575137	115	A1	Zemaitukai	Europe
214	JQ520255	116	A1	East europe unspecified horse	Europe
215	KP731359	116	A1	Lipizzan	Europe
216	JQ360701	116	A1	East asia unspecified horse	East Asia
217	KU601738	116	A1	South Europe unspecified horse	Europe
218	DQ327918	116	A1	Irish Draught	Europe
219	AF132569	116	A1	Arabian	West Asia
220	JN398406	116	A1	Arabian	West Asia
221	AJ413732	116	A1	Konik	Europe
222	KC147121	116	A1	Middle Europe unspecified horse	Europe
223	KC147122	116	A1	Middle Europe unspecified horse	Europe
224	KC147123	116	A1	Middle Europe unspecified horse	Europe
225	KC147124	116	A1	Middle Europe unspecified horse	Europe
226	KP212432	116	A1	Middle Europe unspecified horse	Europe
227	DQ297627	117	A1	Mongolian horse	East Asia
228	DQ327900	117	A1	Irish Draught	Europe
229	JN790868	117	A1	Mongolian horse	East Asia
230	JN790870	117	A1	Mongolian horse	East Asia
231	JN790871	117	A1	Mongolian horse	East Asia
232	JQ360733	117	A1	East asia unspecified horse	East Asia
233	KT167259	117	A1	East asia unspecified horse	East Asia
234	KP731338	118	A1	Lipizzan	Europe
235	KP731339	118	A1	Lipizzan	Europe
236	EU433804	118	A1	Asia unspecified horse	East Asia
237	JN790888	118	A1	Asia unspecified horse	East Asia
238	JQ340103	118	A1	Asia unspecified horse	East Asia
239	KT167217	118	A1	Asia unspecified horse	East Asia
240	KT211052	118	A1	Luoping	East Asia
241	KC527020	118	A1	South Europe unspecified horse	Europe
242	KF192381	118	A1	Italian unspecified breed	Europe
243	KF192382	118	A1	Italian unspecified breed	Europe
244	KU711273	118	A1	Maremmano	Europe
245	KU711486	118	A1	Tolfetano	Europe
246	AF168692	118	A1	Lipizzan breed	Europe
247	DQ327854	118	A1	Kerry Bog Pony	Europe
248	HM483882	118	A1	west asia unspecified horse	West Asia
249	JN210996	118	A1	Iranian unspecified breed	West Asia
250	AY246236	118	A1	Haflinger	Europe
251	JQ950351	118	A1	Czech native horse	Europe
252	EF433394	119	A1	Pinias	Europe
253	HQ439468	119	A1	Kabardin	Europe
254	HQ439481	119	A1	Orlov Trotter	Europe
255	AB329598	119	A1	Tokara native horse	East Asia
256	AF354432	119	A1	Jeju	East Asia
257	MG001444	119	A1	East asia unspecified horse	East Asia
258	DQ297631	119	A1	Mongolian horse	East Asia
259	DQ297637	119	A1	Wugumuqin horse	East Asia
260	DQ986465	119	A1	Tiben horse	East Asia
261	EF597513	119	A1	Naqu horse	East Asia
262	EU433756	119	A1	East asia unspecified horse	East Asia
263	EU433761	119	A1	East asia unspecified horse	East Asia
264	EU433822	119	A1	East asia unspecified horse	East Asia
265	EU931585	119	A1	Asia ancient horse	ancient
266	EU931589	119	A1	Asia ancient horse	ancient
267	EU931596	119	A1	Asia ancient horse	ancient
268	FJ204334	119	A1	Tuva ancient horse	ancient
269	JN224840	119	A1	Mongolian horse	East Asia
270	JN790882	119	A1	Mongolian horse	East Asia
271	JN790886	119	A1	Mongolian horse	East Asia
272	JQ340147	119	A1	East asia unspecified horse	East Asia
273	JQ340159	119	A1	East asia unspecified horse	East Asia
274	KT368741	119	A1	Mongolian_horse	East Asia
275	JQ360655	119	A1	East asia unspecified horse	East Asia
276	JQ360667	119	A1	East asia unspecified horse	East Asia
277	JQ360692	119	A1	East asia unspecified horse	East Asia
278	KT167261	119	A1	East asia unspecified horse	East Asia
279	KT211069	119	A1	China native horse	East Asia
280	KT211079	119	A1	China native horse	East Asia
281	KT211117	119	A1	China native horse	East Asia
282	KT368739	119	A1	Mongolian horse	East Asia
283	KU711098	119	A1	Arabian horse	West Asia
284	KU711103	119	A1	Arabian horse	West Asia
285	KU711110	119	A1	Arabian horse	West Asia
286	AY462426	119	A1	Giara	Europe
287	AY462428	119	A1	Giara	Europe
288	AY462430	119	A1	Giara	Europe
289	EU750717	119	A1	Sanfratellano	Europe
290	EU831235	119	A1	Sicilian Indigenous	Europe
291	JF804122	119	A1	Italian unspecified breed	Europe
292	JF804129	119	A1	Italian unspecified breed	Europe
293	JF804132	119	A1	Italian unspecified breed	Europe
294	JF804134	119	A1	Italian unspecified breed	Europe
295	JF804137	119	A1	Italian unspecified breed	Europe
296	JF804140	119	A1	Italian unspecified breed	Europe
297	JN398407	119	A1	Giara Horse (Sardinia)	Europe
298	KF192384	119	A1	Italian unspecified breed	Europe
299	KF192385	119	A1	Italian unspecified breed	Europe
300	KF192386	119	A1	Italian unspecified breed	Europe
301	KU601740	119	A1	South Europe unspecified horse	Europe
302	KU711155	119	A1	Bardigiano	Europe
303	KU711160	119	A1	Bardigiano	Europe
304	KU711165	119	A1	Bardigiano	Europe
305	KU711176	119	A1	Esperia	Europe
306	KU711177	119	A1	Esperia	Europe
307	KU711184	119	A1	Esperia	Europe
308	KU711185	119	A1	Esperia	Europe
309	KU711189	119	A1	Esperia	Europe
310	KU711196	119	A1	Giara	Europe
311	KU711228	119	A1	Giara	Europe
312	KU711229	119	A1	Giara	Europe
313	KU711261	119	A1	Maremmano	Europe
314	KU711298	119	A1	Maremmano	Europe
315	KU711303	119	A1	Maremmano	Europe
316	KU711306	119	A1	Maremmano	Europe
317	KU711318	119	A1	Maremmano	Europe
318	KU711319	119	A1	Maremmano	Europe
319	KU711322	119	A1	Maremmano	Europe
320	KU711361	119	A1	Monterufolino	Europe
321	KU711362	119	A1	Monterufolino	Europe
322	KU711453	119	A1	Sardinian Anglo-Arab	Europe
323	KU711466	119	A1	Sardinian Anglo-Arab	Europe
324	KU711483	119	A1	Tolfetano	Europe
325	HE580453	119	A1	South Asia unspecified horse	East Asia
326	DQ327984	119	A1	Mesenskay	West Asia
327	DQ328002	119	A1	Orlov	West Asia
328	DQ328019	119	A1	Orlov	West Asia
329	JQ936435	119	A1	Eurosian unspecified horse	West Asia
330	JQ936444	119	A1	Eurosian unspecified horse	West Asia
331	JQ936445	119	A1	Eurosian unspecified horse	West Asia
332	JQ936446	119	A1	Eurosian unspecified horse	West Asia
333	JQ936450	119	A1	Eurosian unspecified horse	West Asia
334	JQ936451	119	A1	Eurosian unspecified horse	West Asia
335	KT368758	119	A1	Przewalski horse	West Asia
336	KT827476	119	A1	Eurosian unspecified horse	West Asia
337	KT827477	119	A1	Eurosian unspecified horse	West Asia
338	KT827478	119	A1	Eurosian unspecified horse	West Asia
339	KT827479	119	A1	Eurosian unspecified horse	West Asia
340	AJ413919	119	A1	Shetland Pony	Europe
341	AY293986	119	A1	Lusitano	Europe
342	AY519876	119	A1	Asturcon	Europe
343	AY519897	119	A1	Cartujano (Carthusian)	Europe
344	AY519902	119	A1	Cartujano (Carthusian)	Europe
345	AY519904	119	A1	Cartujano (Carthusian)	Europe
346	AY519927	119	A1	Losino	Europe
347	AY805645	119	A1	Pura Raza Espanola	Europe
348	GU563682	119	A1	West Europe unspecified horse	Europe
349	GU563690	119	A1	West Europe unspecified horse	Europe
350	HQ439454	119	A1	Camargue	Europe
351	HQ592866	119	A1	West Europe unspecified horse	Europe
352	HQ827133	119	A1	West Europe unspecified horse	Europe
353	HQ827134	119	A1	West Europe unspecified horse	Europe
354	JQ229820	119	A1	Spanish native horse	Europe
355	KU711243	119	A1	Lipizzan	Europe
356	KU711249	119	A1	Lipizzan	Europe
357	KU711254	119	A1	Lipizzan	Europe
358	KU711256	119	A1	Lipizzan	Europe
359	HM483875	119	A1	west asia unspecified horse	West Asia
360	JN210980	119	A1	Middle east unspecified horse	West Asia
361	JN398405	119	A1	Unspecified Iranian Breed	West Asia
362	EU093071	119	A1	Hucul	Europe
363	HQ439479	119	A1	Liebenthaler	Europe
364	KC143339	119	A1	Middle Europe unspecified horse	Europe
365	DQ327950	119	A1	Akhal-Teke	West Asia
366	DQ327951	119	A1	Akhal-Teke	West Asia
367	DQ327954	119	A1	Akhal-Teke	West Asia
368	DQ327955	119	A1	Akhal-Teke	West Asia
369	EU093058	119	A1	Turkoman Akhal-Teke	West Asia
370	JN398404	119	A1	Akhal-Teke	West Asia
371	AF132592	120	A1	Arabian	West Asia
372	EU433808	120	A1	Asia unspecified horse	East Asia
373	JN210969	120	A1	Iranian unspecified breed	West Asia
374	JN398412	120	A1	Arabian	West Asia
375	KT596764	120	A1	Hequ horse	East Asia
376	KT167305	121	A1	East asia unspecified horse	East Asia
377	KT211177	121	A1	China native horse	East Asia
378	AJ413731	168	A1	Konik	Europe
379	AJ413735	168	A1	Konik	Europe
380	JF804117	181	A1	Italian unspecified breed	Europe
381	KU711230	181	A1	Giara	Europe
382	KU711233	181	A1	Lipizzan	Europe
383	KU711238	181	A1	Lipizzan	Europe
384	KU711246	181	A1	Lipizzan	Europe
385	KU711250	181	A1	Lipizzan	Europe
386	KU711257	181	A1	Lipizzan	Europe
387	KU711352	181	A1	Monterufolino	Europe
388	KU711454	181	A1	Sardinian Anglo-Arab	Europe
389	KU711455	181	A1	Sardinian Anglo-Arab	Europe
390	KU711459	181	A1	Sardinian Anglo-Arab	Europe
391	HQ592788	182	A1	Newfoundland	Europe
392	AY246220	182	A1	Exmoor	Europe
393	HQ592819	182	A1	Eriskay	Europe
394	HQ592976	182	A1	Eriskay	Europe
395	HQ592977	182	A1	Eriskay	Europe
396	HQ592978	182	A1	Eriskay	Europe
397	FJ204333	207	A1	Tuva ancient horse	ancient
398	JQ936385	207	A1	Eurasian unspecified horse	West Asia
399	AB329597	210	A1	Breton	East Asia
400	AB859014	224	A1	Japanese Unspecified Breed	East Asia
401	DQ900928	224	A1	Bronze Age horse	ancient
402	EU433747	224	A1	Asia unspecified horse	East Asia
403	AY246242	231	A1	Lusitano	Europe
404	AY246244	231	A1	Lusitano	Europe
405	AY246245	231	A1	Lusitano	Europe
406	AY525096	231	A1	Lusitano	Europe
407	KC847166	240	A1	Russia unspecified breed	West Asia
408	KF849272	240	A1	Russia unspecified breed	West Asia
409	JQ340091	247	A1	Unspecified Breed	East Asia
410	JQ340169	249	A1	East asia unspecified horse	East Asia
411	JQ360689	249	A1	East asia unspecified horse	East Asia
412	HQ439472	250	A1	Kladruber	Europe
413	JQ950352	250	A1	Czech native horse	Europe
414	KC202961	251	A1	West Europe unspecified horse	Europe
415	KC202962	251	A1	West Europe unspecified horse	Europe
416	KU711084	251	A1	Arabian horse	West Asia
417	KU711112	251	A1	Arabian horse	West Asia
418	KU711346	251	A1	Monterufolino	Europe
419	KC202964	251	A1	Thoroughbred	Europe
420	KC202960	252	A1	Thoroughbred	Europe
421	DQ007571	295	A1	Rusian ancient horse	ancient
422	JQ360774	295	A1	East asia unspecified horse	East Asia
423	KF192388	295	A1	Italian unspecified breed	Europe
424	KR013119	295	A1	Italian unspecified breed	Europe
425	AF466011	322	A1	Potoka	Europe
426	DQ327850	333	A1	ancient horse	ancient
427	KC840716	395	A1	Middle east unspecified horse	West Asia
428	KC840771	395	A1	Middle east unspecified horse	West Asia
429	KC840776	395	A1	Middle east unspecified horse	West Asia
430	KC840780	395	A1	Middle east unspecified horse	West Asia
431	KC840786	395	A1	Middle east unspecified horse	West Asia
432	KC840788	395	A1	Middle east unspecified horse	West Asia
433	AF014409	169	A2	Przewalski's horse	East Asia
434	AJ413830	169	A2	Mongolian wild horse	East Asia
435	AJ413831	169	A2	Mongolian wild horse	East Asia
436	AJ413832	169	A2	Mongolian wild horse	East Asia
437	AP012267	169	A2	Przewalski's horse	East Asia
438	AP012268	169	A2	Przewalski's horse	East Asia
439	AP012270	169	A2	Przewalski's horse	East Asia
440	AP013095	169	A2	Przewalski's horse	East Asia
441	HQ439484	169	A2	Przewalski's horse	East Asia
442	JQ360823	169	A2	Przewalski's horse	East Asia
443	JX032647	169	A2	Przewalski's horse	East Asia
444	AF072995	169	A2	Przewalski's horse	West Asia
445	KT368744	169	A2	Przewalski's horse	West Asia
446	KT368745	169	A2	Przewalski's horse	West Asia
447	KT368746	169	A2	Przewalski's horse	West Asia
448	KT368747	169	A2	Przewalski's horse	West Asia
449	KT368748	169	A2	Przewalski's horse	West Asia
450	KT368753	169	A2	Przewalski's horse	West Asia
451	KT368754	169	A2	Przewalski's horse	West Asia
452	KT757761	169	A2	Przewalski's horse	West Asia
453	KC143355	169	A2	Przewalski's horse	Europe
454	JN398402	169	A2	Przewalski's horse	West Asia
455	JN398403	169	A2	Przewalski's horse	West Asia
456	AY575107	11	A3	Gotland	Europe
457	HQ592872	11	A3	Fjord unspecified breed	Europe
458	HQ592873	11	A3	Fjord unspecified breed	Europe
459	HQ592874	11	A3	Fjord unspecified breed	Europe
460	HQ592879	11	A3	Fjord unspecified breed	Europe
461	JF951835	11	A3	East europe unspecified horse	Europe
462	EF433384	11	A3	Pindos	Europe
463	HQ439474	11	A3	Kuznet	Europe
464	HQ439486	11	A3	Russian Riding Horse	Europe
465	JQ520275	11	A3	East europe unspecified horse	Europe
466	JQ520283	11	A3	East europe unspecified horse	Europe
467	JQ520285	11	A3	East europe unspecified horse	Europe
468	JQ520296	11	A3	East europe unspecified horse	Europe
469	JQ520298	11	A3	East europe unspecified horse	Europe
470	JQ520308	11	A3	East europe unspecified horse	Europe
471	AF014408	11	A3	East asia unspecified horse	East Asia
472	AP013090	11	A3	Japanese Unspecified Breed	East Asia
473	DQ327992	11	A3	Mongolia horse	East Asia
474	DQ327993	11	A3	Mongolia horse	East Asia
475	EU433707	11	A3	East asia unspecified horse	East Asia
476	EU433709	11	A3	East asia unspecified horse	East Asia
477	EU433711	11	A3	East asia unspecified horse	East Asia
478	EU433790	11	A3	East asia unspecified horse	East Asia
479	FJ204321	11	A3	West Siberia ancient horse	ancient
480	HQ592966	11	A3	Mongolian horse	East Asia
481	JN224861	11	A3	Mongolian horse	East Asia
482	JQ340126	11	A3	East asia unspecified horse	East Asia
483	JQ340154	11	A3	East asia unspecified horse	East Asia
484	JQ360673	11	A3	East asia unspecified horse	East Asia
485	JQ360712	11	A3	East asia unspecified horse	East Asia
486	JQ360725	11	A3	East asia unspecified horse	East Asia
487	JQ360775	11	A3	East asia unspecified horse	East Asia
488	JQ360777	11	A3	East asia unspecified horse	East Asia
489	KT167287	11	A3	East asia unspecified horse	East Asia
490	KT211081	11	A3	Chian native horse	East Asia
491	KT211149	11	A3	Chian native horse	East Asia
492	KT211172	11	A3	Chian native horse	East Asia
493	KT211212	11	A3	Chian native horse	East Asia
494	KT211213	11	A3	Chian native horse	East Asia
495	MG001436	11	A3	East asia unspecified horse	East Asia
496	AF516501	11	A3	Garrano	Europe
497	AY519917	11	A3	Garrano	Europe
498	AY997193	11	A3	Garrano	Europe
499	EU750720	11	A3	Sanfratellano	Europe
500	EU831237	11	A3	Sicilian Indigenous	Europe
501	EU831238	11	A3	Sanfratellano	Europe
502	JF804120	11	A3	Unspecified Italian Breed	Europe
503	JN398390	11	A3	Unspecified Italian Breed	Europe
504	KF192364	11	A3	Unspecified Italian Breed	Europe
505	KF192365	11	A3	Unspecified Italian Breed	Europe
506	KF192366	11	A3	Unspecified Italian Breed	Europe
507	KF192367	11	A3	Unspecified Italian Breed	Europe
508	KU601638	11	A3	South Europe unspecified horse	Europe
509	KU601639	11	A3	South Europe unspecified horse	Europe
510	KU601641	11	A3	South Europe unspecified horse	Europe
511	KU601642	11	A3	South Europe unspecified horse	Europe
512	KU601643	11	A3	South Europe unspecified horse	Europe
513	KU711126	11	A3	Bardigiano	Europe
514	KU711137	11	A3	Bardigiano	Europe
515	KU711139	11	A3	Bardigiano	Europe
516	KU711140	11	A3	Bardigiano	Europe
517	KU711153	11	A3	Bardigiano	Europe
518	KU711297	11	A3	Maremmano	Europe
519	KU711333	11	A3	Maremmano	Europe
520	KU711353	11	A3	Monterufolino	Europe
521	KU711441	11	A3	Sardinian Anglo-Arab	Europe
522	KU711447	11	A3	Sardinian Anglo-Arab	Europe
523	EU433850	11	A3	South Asia unspecified horse	East Asia
524	HE572607	11	A3	South Asia unspecified horse	East Asia
525	HE572617	11	A3	South Asia unspecified horse	East Asia
526	AF481269	11	A3	Cukorova	West Asia
527	AF481328	11	A3	Tuva	West Asia
528	DQ328024	11	A3	Vyatskaya	West Asia
529	DQ328029	11	A3	Vyatskaya	West Asia
530	DQ328032	11	A3	Vyatskaya	West Asia
531	DQ328035	11	A3	Vyatskaya	West Asia
532	JQ936364	11	A3	Eurosian unspecified horse	West Asia
533	JQ936383	11	A3	Eurosian unspecified horse	West Asia
534	JQ936411	11	A3	Eurosian unspecified horse	West Asia
535	JQ936413	11	A3	Eurosian unspecified horse	West Asia
536	JQ936428	11	A3	Eurosian unspecified horse	West Asia
537	JQ936430	11	A3	Eurosian unspecified horse	West Asia
538	JQ936441	11	A3	Eurosian unspecified horse	West Asia
539	JQ936457	11	A3	Eurosian unspecified horse	West Asia
540	JQ936476	11	A3	Eurosian unspecified horse	West Asia
541	KF849274	11	A3	Russia unspecified breed	West Asia
542	KF849283	11	A3	Russia unspecified breed	West Asia
543	KF849285	11	A3	Russia unspecified breed	West Asia
544	KT368727	11	A3	Yakut horse	West Asia
545	KT368729	11	A3	Yakut horse	West Asia
546	KT368733	11	A3	Yakut horse	West Asia
547	KT368734	11	A3	Yakut horse	West Asia
548	KT368735	11	A3	Yakut horse	West Asia
549	AB329590	11	A3	Thoroughbred	Europe
550	AF516510	11	A3	Pura Raza Espanola	Europe
551	AJ413619	11	A3	Andalusian	Europe
552	AJ413624	11	A3	Andalusian	Europe
553	AJ413741	11	A3	Lusitano	Europe
554	AJ413742	11	A3	Lusitano	Europe
555	AJ413743	11	A3	Lusitano	Europe
556	AJ413744	11	A3	Lusitano	Europe
557	AJ413745	11	A3	Lusitano	Europe
558	AY057421	11	A3	Lipizzan	Europe
559	AY293989	11	A3	Lusitano	Europe
560	AY293990	11	A3	Lusitano	Europe
561	AY519873	11	A3	Asturcon	Europe
562	AY519934	11	A3	Marismeno	Europe
563	AY519938	11	A3	Marismeno	Europe
564	AY519941	11	A3	Marismeno	Europe
565	AY805654	11	A3	Pura Raza Espanola	Europe
566	AY805661	11	A3	Pura Raza Espanola	Europe
567	DQ327927	11	A3	Irish Draught	Europe
568	DQ327936	11	A3	Irish Draught	Europe
569	EF014975	11	A3	Hispano-Breton	Europe
570	EF014976	11	A3	Hispano-Breton	Europe
571	EF014977	11	A3	Hispano-Breton	Europe
572	EF014978	11	A3	Hispano-Breton	Europe
573	EU256578	11	A3	Hispano-Breton	Europe
574	EU580166	11	A3	thoroughbred	Europe
575	HQ592999	11	A3	New Forest horse	Europe
576	HQ593030	11	A3	Turks and Caicos horse	Europe
577	HQ593033	11	A3	Turks and Caicos horse	Europe
578	HQ593034	11	A3	Turks and Caicos horse	Europe
579	HQ827090	11	A3	West Europe unspecified horse	Europe
580	HQ827124	11	A3	West Europe unspecified horse	Europe
581	HQ827136	11	A3	West Europe unspecified horse	Europe
582	HQ827139	11	A3	West Europe unspecified horse	Europe
583	HQ827141	11	A3	West Europe unspecified horse	Europe
584	HQ827150	11	A3	West Europe unspecified horse	Europe
585	JQ229818	11	A3	Spanish native horse	Europe
586	KC202958	11	A3	West Europe unspecified horse	Europe
587	AF481233	11	A3	Anatolian	West Asia
588	AF481243	11	A3	Anatolian	West Asia
589	HM483993	11	A3	west asia unspecified horse	West Asia
590	AJ413610	11	A3	Arab-Barb-cross	West Asia
591	AJ413640	11	A3	Arabian	West Asia
592	AJ413655	11	A3	Arabian	West Asia
593	AY246180	11	A3	Arabian	West Asia
594	JN210985	11	A3	Iranian unspecified breed	West Asia
595	KU569911	11	A3	Middle east unspecified horse	West Asia
596	KP203270	11	A3	South Europe unspecified horse	Europe
597	KP203271	11	A3	South Europe unspecified horse	Europe
598	KP203274	11	A3	South Europe unspecified horse	Europe
599	AJ413715	11	A3	Holsteiner	Europe
600	AJ413716	11	A3	Holsteiner	Europe
601	AJ413847	11	A3	Rhineland Heavy Draft	Europe
602	EU093030	11	A3	Europe ancient horse	ancient
603	EU093037	11	A3	Europe ancient horse	ancient
604	EU093044	11	A3	Europe ancient horse	ancient
605	HQ439460	11	A3	Westphalian	Europe
606	KC143344	11	A3	Middle Europe unspecified horse	Europe
607	KP212446	11	A3	Middle Europe unspecified horse	Europe
608	KP212453	11	A3	Middle Europe unspecified horse	Europe
609	AJ413696	13	A3	Norwegian Fjord	Europe
610	AJ413697	13	A3	Norwegian Fjord	Europe
611	AJ413698	13	A3	Norwegian Fjord	Europe
612	HQ153724	13	A3	North europe unspecified horse	Europe
613	HQ153735	13	A3	North europe unspecified horse	Europe
614	KJ741432	13	A3	North europe unspecified horse	Europe
615	KJ741438	13	A3	North europe unspecified horse	Europe
616	KJ741439	13	A3	North europe unspecified horse	Europe
617	KJ741446	13	A3	North europe unspecified horse	Europe
618	KJ741463	13	A3	North europe unspecified horse	Europe
619	KJ741507	13	A3	North europe unspecified horse	Europe
620	KJ741510	13	A3	North europe unspecified horse	Europe
621	KJ741516	13	A3	North europe unspecified horse	Europe
622	KJ741554	13	A3	North europe unspecified horse	Europe
623	KJ741561	13	A3	North europe unspecified horse	Europe
624	KJ741569	13	A3	North europe unspecified horse	Europe
625	KJ741584	13	A3	North europe unspecified horse	Europe
626	KJ741605	13	A3	North europe unspecified horse	Europe
627	KJ741640	13	A3	North europe unspecified horse	Europe
628	KJ741768	13	A3	North europe unspecified horse	Europe
629	KJ741772	13	A3	North europe unspecified horse	Europe
630	KJ741824	13	A3	North europe unspecified horse	Europe
631	JQ520286	13	A3	East europe unspecified horse	Europe
632	JQ520306	13	A3	East europe unspecified horse	Europe
633	JQ520326	13	A3	East europe unspecified horse	Europe
634	JQ520327	13	A3	East europe unspecified horse	Europe
635	JQ520329	13	A3	East europe unspecified horse	Europe
636	JQ520335	13	A3	East europe unspecified horse	Europe
637	JQ520344	13	A3	East europe unspecified horse	Europe
638	KP731325	13	A3	Lipizzan	Europe
639	KP731326	13	A3	Lipizzan	Europe
640	KP731327	13	A3	Lipizzan	Europe
641	KP731328	13	A3	Lipizzan	Europe
642	EU203804	13	A3	Guizhou horse	East Asia
643	JN790885	13	A3	Mongolian horse	East Asia
644	JQ340096	13	A3	East asia unspecified horse	East Asia
645	JQ360694	13	A3	East asia unspecified horse	East Asia
646	JQ360723	13	A3	East asia unspecified horse	East Asia
647	KT167218	13	A3	East asia unspecified horse	East Asia
648	KT211058	13	A3	Yanqi	East Asia
649	KT211134	13	A3	Luoping	East Asia
650	AY519920	13	A3	Garrano	Europe
651	EU750718	13	A3	Sicilian Indigenous	Europe
652	JN398387	13	A3	Maremmano	Europe
653	JN398388	13	A3	Maremmano	Europe
654	KF192356	13	A3	Itanlian unspecified horse	Europe
655	KF192357	13	A3	Itanlian unspecified horse	Europe
656	KF192358	13	A3	Itanlian unspecified horse	Europe
657	KF192359	13	A3	Itanlian unspecified horse	Europe
658	KF192360	13	A3	Itanlian unspecified horse	Europe
659	KU601640	13	A3	South Europe unspecified horse	Europe
660	KU711181	13	A3	Esperia	Europe
661	KU711264	13	A3	Maremmano	Europe
662	KU711265	13	A3	Maremmano	Europe
663	KU711275	13	A3	Maremmano	Europe
664	KU711277	13	A3	Maremmano	Europe
665	KU711279	13	A3	Maremmano	Europe
666	KU711283	13	A3	Maremmano	Europe
667	KU711291	13	A3	Maremmano	Europe
668	KU711295	13	A3	Maremmano	Europe
669	KU711320	13	A3	Maremmano	Europe
670	KU711326	13	A3	Maremmano	Europe
671	KU711330	13	A3	Maremmano	Europe
672	KU711340	13	A3	Monterufolino	Europe
673	KU711350	13	A3	Monterufolino	Europe
674	KU711367	13	A3	Murgese	Europe
675	KU711490	13	A3	Tolfetano	Europe
676	KU711505	13	A3	Tolfetano	Europe
677	KU711506	13	A3	Tolfetano	Europe
678	KF849276	13	A3	Russian unspecified Horse	West Asia
679	KF849278	13	A3	Russian unspecified Horse	West Asia
680	KF849279	13	A3	Russian unspecified Horse	West Asia
681	KF849281	13	A3	Russian unspecified Horse	West Asia
682	AB329593	13	A3	Thoroughbred	Europe
683	AB329594	13	A3	Thoroughbred	Europe
684	AF168690	13	A3	Lipizzan breed	Europe
685	AF481249	13	A3	Connemara	Europe
686	AF516505	13	A3	Lusitano	Europe
687	AY293987	13	A3	Lusitano	Europe
688	AY519925	13	A3	Losino	Europe
689	AY519931	13	A3	Losino	Europe
690	AY519937	13	A3	Marismeno	Europe
691	AY519949	13	A3	Merens	Europe
692	AY519968	13	A3	Pottoka	Europe
693	AY805663	13	A3	Pura Raza Espanola	Europe
694	AY997172	13	A3	Pura Raza Espanola	Europe
695	DQ327862	13	A3	Kerry Bog Pony	Europe
696	DQ327867	13	A3	Kerry Bog Pony	Europe
697	EU580169	13	A3	thoroughbred	Europe
698	GU563631	13	A3	West Europe unspecified horse	Europe
699	GU563638	13	A3	West Europe unspecified horse	Europe
700	GU563642	13	A3	West Europe unspecified horse	Europe
701	GU563643	13	A3	West Europe unspecified horse	Europe
702	GU563644	13	A3	West Europe unspecified horse	Europe
703	GU563656	13	A3	West Europe unspecified horse	Europe
704	GU563659	13	A3	West Europe unspecified horse	Europe
705	HQ592857	13	A3	Fell	Europe
706	HQ592858	13	A3	Fell	Europe
707	HQ592859	13	A3	Fell	Europe
708	HQ592870	13	A3	Connemara	Europe
709	HQ592938	13	A3	Kerry Bog	Europe
710	HQ592942	13	A3	Fell	Europe
711	HQ592943	13	A3	Fell	Europe
712	HQ592944	13	A3	Fell	Europe
713	HQ592945	13	A3	Fell	Europe
714	HQ592946	13	A3	Fell	Europe
715	HQ593024	13	A3	Turks and Caicos	Europe
716	HQ593025	13	A3	Turks and Caicos	Europe
717	HQ593026	13	A3	Turks and Caicos	Europe
718	HQ593027	13	A3	Turks and Caicos	Europe
719	HQ593028	13	A3	Turks and Caicos	Europe
720	HQ593029	13	A3	Turks and Caicos	Europe
721	HQ593031	13	A3	Turks and Caicos	Europe
722	HQ827113	13	A3	West Europe unspecified horse	Europe
723	HQ827127	13	A3	West Europe unspecified horse	Europe
724	HQ827138	13	A3	West Europe unspecified horse	Europe
725	HQ827153	13	A3	West Europe unspecified horse	Europe
726	HQ827161	13	A3	West Europe unspecified horse	Europe
727	KC147170	13	A3	West Europe unspecified horse	Europe
728	KC147174	13	A3	West Europe unspecified horse	Europe
729	KC147175	13	A3	West Europe unspecified horse	Europe
730	KC147176	13	A3	West Europe unspecified horse	Europe
731	KC147177	13	A3	West Europe unspecified horse	Europe
732	KC147178	13	A3	West Europe unspecified horse	Europe
733	KC202959	13	A3	West Europe unspecified horse	Europe
734	KJ917295	13	A3	West Europe unspecified horse	Europe
735	AF481237	13	A3	Anatolian	West Asia
736	AF132591	13	A3	Arabian	West Asia
737	AJ413648	13	A3	Arabian	West Asia
738	AY246181	13	A3	Arabian	West Asia
739	AY246182	13	A3	Arabian	West Asia
740	AY246183	13	A3	Arabian	West Asia
741	AY246185	13	A3	Arabian	West Asia
742	EF437556	13	A3	Polish Arabian horses	West Asia
743	JN398389	13	A3	Unspecified Syrian Breed	West Asia
744	KP203276	13	A3	South Europe unspecified horse	Europe
745	KP203278	13	A3	South Europe unspecified horse	Europe
746	KP203280	13	A3	South Europe unspecified horse	Europe
747	AJ413673	13	A3	Duelmener	Europe
748	AJ413709	13	A3	Holsteiner	Europe
749	AJ413710	13	A3	Holsteiner	Europe
750	AJ413833	13	A3	Rhineland Heavy Draft	Europe
751	AJ413921	13	A3	Trakehner	Europe
752	AY575109	13	A3	Hanovarian	Europe
753	AY575131	13	A3	Trakehner	Europe
754	AY575138	13	A3	Zemaitukai	Europe
755	EU093036	13	A3	Europe unspecified horse	ancient
756	HQ439458	13	A3	Holstein	Europe
757	HQ439469	13	A3	Kinsky horse	Europe
758	HQ439488	13	A3	Shagya Arab	Europe
759	JN398386	13	A3	Westphalian	Europe
760	JQ950357	13	A3	Czech native horse	Europe
761	KC147118	13	A3	Middle Europe unspecified horse	Europe
762	KC147119	13	A3	Middle Europe unspecified horse	Europe
763	KC147120	13	A3	Middle Europe unspecified horse	Europe
764	KC147126	13	A3	Middle Europe unspecified horse	Europe
765	KP212444	13	A3	Middle Europe unspecified horse	Europe
766	AJ876890	13	A3	Kazakhstan ancient horse	ancient
767	EU093052	13	A3	Turkoman Akhal-Teke	West Asia
768	EU093053	13	A3	Turkoman Akhal-Teke	West Asia
769	EU093061	13	A3	Turkoman Akhal-Teke	West Asia
770	FJ392566	36	A3	Debao horse	East Asia
771	JQ520262	36	A3	East europe unspecified horse	Europe
772	KP212439	36	A3	Middle Europe unspecified horse	Europe
773	KT167283	36	A3	West Europe unspecified horse	East Asia
774	KT211116	36	A3	China native horse	East Asia
775	HQ827097	294	A3	West Europe unspecified horse	Europe
776	KF192362	294	A3	Itanlian unspecified horse	Europe
777	DQ900926	12	A3	Asia ancient horse	ancient
778	HE580455	12	A3	South Asia unspecified horse	East Asia
779	JQ360795	12	A3	East asia unspecified horse	East Asia
780	KT167298	12	A3	East asia unspecified horse	East Asia
781	KT211151	12	A3	China native horse	East Asia
782	KC147015	14	A3	Middle Europe unspecified horse	Europe
783	KC147016	14	A3	Middle Europe unspecified horse	Europe
784	KC147017	14	A3	Middle Europe unspecified horse	Europe
785	KC147018	14	A3	Middle Europe unspecified horse	Europe
786	KC147019	14	A3	Middle Europe unspecified horse	Europe
787	KC147020	14	A3	Middle Europe unspecified horse	Europe
788	KC147021	14	A3	Middle Europe unspecified horse	Europe
789	KC147023	14	A3	Middle Europe unspecified horse	Europe
790	KC147024	14	A3	Middle Europe unspecified horse	Europe
791	KC147026	14	A3	Middle Europe unspecified horse	Europe
792	KC147034	14	A3	Middle Europe unspecified horse	Europe
793	KC147036	14	A3	Middle Europe unspecified horse	Europe
794	KC147037	14	A3	Middle Europe unspecified horse	Europe
795	KC147039	14	A3	Middle Europe unspecified horse	Europe
796	AJ413714	166	A3	Holsteiner	Europe
797	JQ360722	166	A3	East asia unspecified horse	East Asia
798	KF192363	166	A3	Itanlian unspecified horse	Europe
799	GU339388	174	A3	West Europe unspecified horse	Europe
800	KC143352	174	A3	Middle Europe unspecified horse	Europe
801	AY519878	215	A3	Asturcon	Europe
802	HQ827086	215	A3	South Europe unspecified horse	Europe
803	JQ229821	215	A3	Spanish native horse	Europe
804	EU256607	222	A3	Pura Raza Espanola PRE	Europe
805	EU433758	222	A3	East asia unspecified horse	East Asia
806	KU601636	222	A3	South Europe unspecified horse	Europe
807	KU711182	280	A3	Frosinone province (Latium)	Europe
808	KU711337	280	A3	Pisa and Livorno provinces (Tuscany)	Europe
809	KP212437	300	A3	draft horse breed	Europe
810	JQ520290	300	A3	Noriker horse	Europe
811	AY805656	319	A3	Pura Raza Espanola	Europe
812	HQ827104	319	A3	West Europe unspecified horse	Europe
813	HQ827093	319	A3	West Europe unspecified horse	Europe
814	EU433844	320	A3	India native horse	East Asia
815	JQ936352	352	A3	Eurasian unspecified horse	West Asia
816	JQ936473	352	A3	Eurasian unspecified horse	West Asia
817	JQ936410	353	A3	Eurasian unspecified horse	West Asia
818	KC840715	385	A3	Middle east unspecified horse	West Asia
819	KC840722	385	A3	Middle east unspecified horse	West Asia
820	KC840734	385	A3	Middle east unspecified horse	West Asia
821	KC840739	385	A3	Middle east unspecified horse	West Asia
822	KC840754	385	A3	Middle east unspecified horse	West Asia
823	KC840760	385	A3	Middle east unspecified horse	West Asia
824	KC840775	385	A3	Middle east unspecified horse	West Asia
825	KC840794	385	A3	Middle east unspecified horse	West Asia
826	DQ327852	177	A4	Kerry Bog Pony	Europe
827	DQ327875	177	A4	Kerry Bog Pony	Europe
828	DQ327888	177	A4	Kerry Bog Pony	Europe
829	DQ327919	177	A4	Irish Draught	Europe
830	HQ592844	177	A4	Kerry Bog	Europe
831	AY519950	217	A4	Merens	Europe
832	HQ827109	217	A4	West Europe unspecified horse	Europe
833	JQ360785	217	A4	east asia unspecified horse	East Asia
834	KF192349	217	A4	India native horse	Europe
835	KU711154	217	A4	Bardigiano	Europe
836	KU711164	217	A4	Bardigiano	Europe
837	KU711175	217	A4	Esperia	Europe
838	AB329587	1	A4	Mongolian horse	East Asia
839	AP013080	1	A4	Japanese unspecified horse	East Asia
840	AP013101	1	A4	Japanese unspecified horse	East Asia
841	EU203750	1	A4	Guanzhong horse	East Asia
842	EU433777	1	A4	East asia unspecified horse	East Asia
843	FJ502833	1	A4	Debao horse	East Asia
844	FJ502834	1	A4	Dali	East Asia
845	JQ340149	1	A4	East asia unspecified horse	East Asia
846	KT167256	1	A4	East asia unspecified horse	East Asia
847	KT211103	1	A4	Chian native horse	East Asia
848	JN398377	1	A4	Chincoteague Pony	Europe
849	NC001640	1	A4	Chian native horse	East Asia
850	X79547	1	A4	Chian native horse	East Asia
851	KF192343	1	A4	Itanlian unspecified horse	Europe
852	KF192344	1	A4	Itanlian unspecified horse	Europe
853	KF192345	1	A4	Itanlian unspecified horse	Europe
854	KF192346	1	A4	Itanlian unspecified horse	Europe
855	KF192347	1	A4	Itanlian unspecified horse	Europe
856	KF192348	1	A4	Itanlian unspecified horse	Europe
857	KU711152	1	A4	Bardigiano	Europe
858	KU711169	1	A4	Esperia	Europe
859	KU711183	1	A4	Esperia	Europe
860	KU711192	1	A4	Esperia	Europe
861	KU711323	1	A4	Maremmano	Europe
862	KU711496	1	A4	Tolfetano	Europe
863	KU711499	1	A4	Tolfetano	Europe
864	DQ328007	1	A4	Orlov	West Asia
865	DQ328008	1	A4	Orlov	West Asia
866	AJ413684	1	A4	Exmoor	Europe
867	AJ413685	1	A4	Exmoor	Europe
868	AJ413687	1	A4	Exmoor	Europe
869	AJ413869	1	A4	Scottish Highland	Europe
870	AJ413870	1	A4	Scottish Highland	Europe
871	AJ413926	1	A4	Welsh Pony	Europe
872	AY246187	1	A4	Belgian	Europe
873	AY246188	1	A4	Belgian	Europe
874	AY246189	1	A4	Belgian	Europe
875	AY246194	1	A4	Belgian	Europe
876	AY293991	1	A4	Lusitano	Europe
877	AY519930	1	A4	Losino	Europe
878	DQ327848	1	A4	Europe ancient horse	ancient
879	DQ327871	1	A4	Kerry Bog Pony	Europe
880	DQ327873	1	A4	Kerry Bog Pony	Europe
881	DQ327882	1	A4	Kerry Bog Pony	Europe
882	DQ327909	1	A4	Irish Draught	Europe
883	DQ327940	1	A4	Irish Draught	Europe
884	DQ327941	1	A4	Irish Draught	Europe
885	EU580153	1	A4	thoroughbred	Europe
886	GU563651	1	A4	West Europe unspecified horse	Europe
887	HQ592790	1	A4	Dartmoor horse	Europe
888	HQ592791	1	A4	Dartmoor horse	Europe
889	HQ592792	1	A4	Dartmoor horse	Europe
890	HQ592793	1	A4	Dartmoor horse	Europe
891	HQ592795	1	A4	Dartmoor horse	Europe
892	HQ592797	1	A4	Dartmoor horse	Europe
893	HQ592799	1	A4	Dartmoor horse	Europe
894	HQ592863	1	A4	Connemara horse	Europe
895	HQ592865	1	A4	Connemara horse	Europe
896	HQ592867	1	A4	Connemara horse	Europe
897	HQ592869	1	A4	Connemara horse	Europe
898	HQ592893	1	A4	Welsh horse	Europe
899	HQ592930	1	A4	Dartmoor horse	Europe
900	HQ592931	1	A4	Dartmoor horse	Europe
901	HQ592972	1	A4	Exmoor horse	Europe
902	HQ827095	1	A4	West Europe unspecified horse	Europe
903	HQ827107	1	A4	West Europe unspecified horse	Europe
904	HQ827119	1	A4	West Europe unspecified horse	Europe
905	HQ827156	1	A4	West Europe unspecified horse	Europe
906	HQ848967	1	A4	British horse	Europe
907	HQ848969	1	A4	West Europe unspecified horse	Europe
908	KC147195	1	A4	West Europe unspecified horse	Europe
909	KC147198	1	A4	West Europe unspecified horse	Europe
910	KC527022	1	A4	West Europe unspecified horse	Europe
911	KC147060	1	A4	Middle Europe unspecified horse	Europe
912	KC147070	1	A4	Middle Europe unspecified horse	Europe
913	HQ439491	242	A4	Arabian	West Asia
914	KU711108	281	A4	Arabian horse	West Asia
915	JF951837	2	A5	North europe unspecified horse	Europe
916	JF951838	2	A5	North europe unspecified horse	Europe
917	GU339387	2	A5	East europe unspecified horse	Europe
918	HQ439475	2	A5	Kuznet	Europe
919	JQ520268	2	A5	East europe unspecified horse	Europe
920	JQ520288	2	A5	East europe unspecified horse	Europe
921	AB329588	2	A5	Taishu native horse	East Asia
922	AP013102	2	A5	Taishu native horse	East Asia
923	DQ297622	2	A5	Mogolian horse	East Asia
924	DQ327843	2	A5	Guanshan horse	East Asia
925	EU203755	2	A5	Guizhou horse	East Asia
926	EU203762	2	A5	Guizhou horse	East Asia
927	EU203764	2	A5	Guizhou horse	East Asia
928	EU203765	2	A5	Guizhou horse	East Asia
929	EU203766	2	A5	Guizhou horse	East Asia
930	EU203772	2	A5	Guizhou horse	East Asia
931	EU203775	2	A5	Guizhou horse	East Asia
932	EU203796	2	A5	Guizhou horse	East Asia
933	EU203800	2	A5	Guizhou horse	East Asia
934	EU203802	2	A5	Guizhou horse	East Asia
935	EU203803	2	A5	Guizhou horse	East Asia
936	EU203807	2	A5	Guizhou horse	East Asia
937	EU203819	2	A5	Hasake horse	East Asia
938	EU203832	2	A5	Naqu horse	East Asia
939	EU203849	2	A5	Naqu horse	East Asia
940	EU433694	2	A5	East asia unspecified horse	East Asia
941	EU433720	2	A5	East asia unspecified horse	East Asia
942	EU433723	2	A5	East asia unspecified horse	East Asia
943	EU433773	2	A5	East asia unspecified horse	East Asia
944	EU433810	2	A5	East asia unspecified horse	East Asia
945	EU433829	2	A5	East asia unspecified horse	East Asia
946	EU433837	2	A5	East asia unspecified horse	East Asia
947	FJ392563	2	A5	Debao horse	East Asia
948	FJ392575	2	A5	Debao horse	East Asia
949	FJ718998	2	A5	China native horse	East Asia
950	GQ203127	2	A5	Debao horse	East Asia
951	HQ592959	2	A5	Mongolian horse	East Asia
952	HQ592964	2	A5	Mongolian horse	East Asia
953	JN224841	2	A5	Mongolian horse	East Asia
954	JN790897	2	A5	Mongolian horse	East Asia
955	JQ340116	2	A5	East asia unspecified horse	East Asia
956	JQ340161	2	A5	East asia unspecified horse	East Asia
957	JQ360755	2	A5	East asia unspecified horse	East Asia
958	JQ360766	2	A5	East asia unspecified horse	East Asia
959	KC714044	2	A5	Mongolian horse	East Asia
960	KT167200	2	A5	East asia unspecified horse	East Asia
961	KT211053	2	A5	Naqu	East Asia
962	KT211124	2	A5	Zhaotong	East Asia
963	KT211138	2	A5	Yimen	East Asia
964	KT211152	2	A5	Yunnan Pony	East Asia
965	KT211160	2	A5	Jinjiang	East Asia
966	KT211175	2	A5	Iner Mogolia	East Asia
967	KT211192	2	A5	Jiangchang	East Asia
968	MG001416	2	A5	East asia unspecified horse	East Asia
969	MG001435	2	A5	East asia unspecified horse	East Asia
970	AF431968	2	A5	Posavina	Europe
971	AY246249	2	A5	Noriker	Europe
972	AY246251	2	A5	Noriker	Europe
973	EU750731	2	A5	Sicilian Indigenous	Europe
974	JN398379	2	A5	Maremmano	Europe
975	JN398381	2	A5	Maremmano	Europe
976	JN398382	2	A5	Maremmano	Europe
977	KF192350	2	A5	Itanlian unspecified horse	Europe
978	KF192351	2	A5	Itanlian unspecified horse	Europe
979	KF192352	2	A5	Itanlian unspecified horse	Europe
980	KF192353	2	A5	Itanlian unspecified horse	Europe
981	KU601625	2	A5	South Europe unspecified horse	Europe
982	KU601630	2	A5	South Europe unspecified horse	Europe
983	KU601631	2	A5	South Europe unspecified horse	Europe
984	KU601632	2	A5	South Europe unspecified horse	Europe
985	KU601633	2	A5	South Europe unspecified horse	Europe
986	KU601634	2	A5	South Europe unspecified horse	Europe
987	KU601635	2	A5	South Europe unspecified horse	Europe
988	KU711159	2	A5	Bardigiano	Europe
989	KU711171	2	A5	Esperia	Europe
990	KU711174	2	A5	Esperia	Europe
991	KU711193	2	A5	Esperia	Europe
992	KU711195	2	A5	Giara	Europe
993	KU711310	2	A5	Maremmano	Europe
994	KU711324	2	A5	Maremmano	Europe
995	KU711342	2	A5	Monterufolino	Europe
996	KU711358	2	A5	Monterufolino	Europe
997	KU711410	2	A5	Sarcidano	Europe
998	KU711485	2	A5	Tolfetano	Europe
999	HE565647	2	A5	India native horse	East Asia
1000	HE565668	2	A5	India native horse	East Asia
1001	HE565670	2	A5	India native horse	East Asia
1002	HE565867	2	A5	India native horse	East Asia
1003	HE565871	2	A5	India native horse	East Asia
1004	HE565877	2	A5	India native horse	East Asia
1005	JN628874	2	A5	India native horse	East Asia
1006	AF481263	2	A5	Cukorova	West Asia
1007	AF481267	2	A5	Cukorova	West Asia
1008	AJ413726	2	A5	Caspian	West Asia
1009	AJ413727	2	A5	Caspian	West Asia
1010	DQ327970	2	A5	Mesenskay	West Asia
1011	DQ328004	2	A5	Orlov	West Asia
1012	DQ328006	2	A5	Orlov	West Asia
1013	DQ328009	2	A5	Orlov	West Asia
1014	DQ328014	2	A5	Orlov	West Asia
1015	DQ328016	2	A5	Orlov	West Asia
1016	DQ328017	2	A5	Orlov	West Asia
1017	DQ328022	2	A5	Vyatskaya	West Asia
1018	DQ328027	2	A5	Vyatskaya	West Asia
1019	DQ328054	2	A5	Yakut	West Asia
1020	DQ328057	2	A5	Yakut	West Asia
1021	FJ204345	2	A5	Chian ancient horse	ancient
1022	FJ204368	2	A5	North Armenia ancient horse	ancient
1023	FJ204371	2	A5	North Armenia ancient horse	ancient
1024	JQ936442	2	A5	Eurosian unspecified horse	West Asia
1025	JQ936452	2	A5	Eurosian unspecified horse	West Asia
1026	JQ936453	2	A5	Eurosian unspecified horse	West Asia
1027	AF481254	2	A5	Connemara	Europe
1028	AY057420	2	A5	Lipizzan	Europe
1029	DQ327899	2	A5	Irish Draught	Europe
1030	DQ327908	2	A5	Irish Draught	Europe
1031	DQ327911	2	A5	Irish Draught	Europe
1032	DQ327923	2	A5	Irish Draught	Europe
1033	DQ327931	2	A5	Irish Draught	Europe
1034	DQ683526	2	A5	Iberian Peninsula horse	ancient
1035	EU580165	2	A5	thoroughbred	Europe
1036	HQ592860	2	A5	Connemara horse	Europe
1037	HQ827098	2	A5	West Europe unspecified horse	Europe
1038	KC202956	2	A5	West Europe unspecified horse	Europe
1039	KC202957	2	A5	West Europe unspecified horse	Europe
1040	KJ917268	2	A5	West Europe unspecified horse	Europe
1041	AF132587	2	A5	Arabian	West Asia
1042	AF466003	2	A5	Arabian	West Asia
1043	JN211005	2	A5	Iranian unspecified breed	West Asia
1044	KT757739	2	A5	Arabian	West Asia
1045	AJ413733	2	A5	Konik	Europe
1046	AY246241	2	A5	Haflinger	Europe
1047	FJ624152	2	A5	Hungary horse	Europe
1048	JQ950362	2	A5	Czech native horse	Europe
1049	KC143347	2	A5	Middle Europe unspecified horse	Europe
1050	KC147104	2	A5	Middle Europe unspecified horse	Europe
1051	KC147105	2	A5	Middle Europe unspecified horse	Europe
1052	KC147106	2	A5	Middle Europe unspecified horse	Europe
1053	KC147107	2	A5	Middle Europe unspecified horse	Europe
1054	KC147108	2	A5	Middle Europe unspecified horse	Europe
1055	KC147109	2	A5	Middle Europe unspecified horse	Europe
1056	KP212436	2	A5	Middle Europe unspecified horse	Europe
1057	KP212459	2	A5	Middle Europe unspecified horse	Europe
1058	AJ876892	2	A5	Kazakhstan ancient horse	ancient
1059	EU093051	2	A5	Turkoman Akhal-Teke	West Asia
1060	EU093059	2	A5	Turkoman Akhal-Teke	West Asia
1061	EU093060	2	A5	Turkoman Akhal-Teke	West Asia
1062	HQ439441	2	A5	Akhal-Teke	West Asia
1063	KT167318	3	A5	East europe unspecified horse	East Asia
1064	KT211219	3	A5	China native horse	East Asia
1065	AB329589	4	A5	Hokkaido native horse	East Asia
1066	AF354429	4	A5	jeju	East Asia
1067	AP013084	4	A5	Japanese Unspecified Breed	East Asia
1068	EF433390	4	A5	Pinias	Europe
1069	EU931587	4	A5	Asian ancient horse	ancient
1070	FJ204319	4	A5	Siberia (Altai) ancient horse	ancient
1071	JN224860	4	A5	Mongolian horse	East Asia
1072	JQ360786	4	A5	East europe unspecified horse	East Asia
1073	JQ360801	4	A5	East europe unspecified horse	East Asia
1074	KT167211	4	A5	East europe unspecified horse	East Asia
1075	KT211165	4	A5	Elunchun	East Asia
1076	KT211195	4	A5	Yanqi	East Asia
1077	AJ413728	5	A5	Caspian	West Asia
1078	AJ413729	5	A5	Caspian	West Asia
1079	EU433831	5	A5	East asia unspecified horse	East Asia
1080	GQ222059	5	A5	Baise horse	East Asia
1081	JN210986	5	A5	Iranian unspecified breed	West Asia
1082	JN398378	5	A5	Caspian Pony	West Asia
1083	JQ360814	5	A5	East asia unspecified horse	East Asia
1084	KT167273	5	A5	East asia unspecified horse	East Asia
1085	KT211098	5	A5	China native horse	East Asia
1086	EU203798	6	A5	Guizhou horse	East Asia
1087	EU203847	6	A5	Naqu horse	East Asia
1088	EU203858	6	A5	Naqu horse	East Asia
1089	EU433726	6	A5	East europe unspecified horse	East Asia
1090	KT167241	6	A5	East europe unspecified horse	East Asia
1091	EU203818	7	A5	Kazakhstan horse	East Asia
1092	EU433830	7	A5	East europe unspecified horse	East Asia
1093	KT167244	7	A5	East europe unspecified horse	East Asia
1094	EU256592	8	A5	Hispano-Breton	Europe
1095	EU433798	8	A5	East asia unspecified horse	East Asia
1096	HM484007	8	A5	west asia unspecified horse	West Asia
1097	JN210993	8	A5	Iranian unspecified breed	West Asia
1098	JQ340142	8	A5	East asia unspecified horse	East Asia
1099	KF192368	8	A5	Italian unspecified breed	Europe
1100	KF192369	8	A5	Italian unspecified breed	Europe
1101	KU711094	8	A5	Arabian horse	West Asia
1102	KU711162	8	A5	Bardigiano	Europe
1103	JQ360641	10	A5	East asia unspecified horse	East Asia
1104	JQ936399	10	A5	Eurosian unspecified horse	West Asia
1105	JQ936401	10	A5	Eurosian unspecified horse	West Asia
1106	KT167222	10	A5	East asia unspecified horse	East Asia
1107	KT211064	10	A5	China native horse	East Asia
1108	JN398380	241	A5	Arabian	West Asia
1109	JQ360682	305	A5	east asia unspecified horse	East Asia
1110	KC840744	383	A5	Middle east unspecified horse	West Asia
1111	JQ360778	9	A6	east asia unspecified horse	East Asia
1112	KT167316	9	A6	east asia unspecified horse	East Asia
1113	KT211070	9	A6	China native horse	East Asia
1114	JN210984	160	A6	Iranian unspecified breed	West Asia
1115	JN398383	160	A6	Unspecified Iranian Breed	West Asia
1116	AF516493	200	A3	Paso Fino	Europe
1117	FJ204373	200	A3	Moldova horse	ancient
1118	JN398391	200	A3	Unspecified Syrian Breed	West Asia
1119	JQ936361	200	A3	Eurosian unspecified horse	West Asia
1120	JQ936455	200	A3	Eurosian unspecified horse	West Asia
1121	DQ007558	346	A6	Germany ancient horse	ancient
1122	JQ950350	346	A6	Czech native horse	Europe
1123	KU575096	21	A6	Egyptian Arabian	West Asia
1124	KT211077	21	A6	China native horse	East Asia
1125	KU711448	21	A6	Italian unspecific Horse	Europe
1126	KU711400	21	A6	Italian unspecific Horse	Europe
1127	JQ340125	21	A6	East asia unspecific horse	East Asia
1128	KP731342	21	A6	lippizan horse	Europe
1129	KF192371	21	A6	Italian horse	Europe
1130	JQ936427	21	A6	unspecified eurasian horse	West Asia
1131	JQ936335	21	A6	unspecified eurasian horse	West Asia
1132	JQ360721	21	A6	East asia unspecific horse	East Asia
1133	JN398395	21	A6	Unspecified Iranian Breed	West Asia
1134	JN398394	21	A6	Unspecified Syrian Breed	West Asia
1135	JN398393	21	A6	Akhal-Teke	West Asia
1136	JN790884	21	A6	Mongolian horse	East Asia
1137	HQ439449	21	A6	Arabian	West Asia
1138	HQ592958	21	A6	Moorland pony	Europe
1139	JN224864	21	A6	Mongolian horses	East Asia
1140	FJ204378	21	A6	China (Qinghai) ancient horse	ancient
1141	GU561996	21	A6	Mongolian horses	East Asia
1142	EU203826	21	A6	China native horse	East Asia
1143	EU433807	21	A6	China native horse	East Asia
1144	EU750724	21	A6	Sicilian autochthonous horse	Europe
1145	EF686025	21	A6	Barb horse	Europe
1146	DQ683534	21	A6	Iberian horses	ancient
1147	EF437554	21	A6	Polish Arabian horses	Europe
1148	EU093066	21	A6	Carpathian Basin horse	West Asia
1149	AY575113	21	A6	India native horse	East Asia
1150	AY246229	21	A6	Friesian horse	Europe
1151	AY246225	21	A6	Friesian horse	Europe
1152	AF481324	21	A6	thoroughbred	Europe
1153	AF481273	21	A6	thoroughbred	Europe
1154	DQ007591	21	A6	Germany unspecific horse	ancient
1155	DQ327960	21	A6	Irish horse	Europe
1156	AJ413639	21	A6	Arabian	West Asia
1157	AY057422	21	A6	Lipizzan	Europe
1158	HE565695	21	A6	Bhutia pony	East Asia
1159	HE565687	21	A6	Bhutia pony	East Asia
1160	HM483988	21	A6	Anatolian horse	West Asia
1161	EU203830	21	A6	China native horse	East Asia
1162	AJ876883	21	A6	Ancient horse	ancient
1163	DQ683535	21	A6	Ancient horse	ancient
1164	AJ413642	21	A6	Arabian	West Asia
1165	AJ413643	21	A6	Arabian	West Asia
1166	AJ413645	21	A6	Arabian	West Asia
1167	AJ413646	21	A6	Arabian	West Asia
1168	AJ413661	21	A6	Arabian	West Asia
1169	DQ328028	21	A6	Vyatskaya	West Asia
1170	EF686026	21	A6	Barb	Europe
1171	EF686030	21	A6	Barb	Europe
1172	EF686036	21	A6	Barb	Europe
1173	EF686037	21	A6	Barb	Europe
1174	EF686039	21	A6	Barb	Europe
1175	EU433735	21	A6	China native horse	East Asia
1176	FJ624157	21	A6	Hungary unspeicfic horse	Europe
1177	JN210982	21	A6	Iranian native horses	West Asia
1178	JN570963	21	A6	tarpan	ancient
1179	JQ936389	21	A6	Mongolian	East Asia
1180	JQ936395	21	A6	Mongolian	East Asia
1181	JQ936414	21	A6	Mongolian	East Asia
1182	KC143337	21	A6	Hungary unspecific horse	Europe
1183	KT167250	21	A6	China native horse	East Asia
1184	MG001426	21	A6	Naqu horse	East Asia
1185	KT827401	22	A6	Eurasian unspecified horse	West Asia
1186	KT827402	22	A6	Eurasian unspecified horse	West Asia
1187	KT827403	22	A6	Eurasian unspecified horse	West Asia
1188	KT827404	22	A6	Eurasian unspecified horse	West Asia
1189	KT827405	22	A6	Eurasian unspecified horse	West Asia
1190	JQ360756	23	A6	east asia unspecified horse	East Asia
1191	KT167292	23	A6	east asia unspecified horse	East Asia
1192	KT211140	23	A6	China native horse	East Asia
1193	KP731322	27	A6	Lipizzan	Europe
1194	KP731323	27	A6	Lipizzan	Europe
1195	KP731324	27	A6	Lipizzan	Europe
1196	EU433785	27	A6	East asia unspecified horse	East Asia
1197	EU433799	27	A6	East asia unspecified horse	East Asia
1198	JN570975	27	A6	Ancient horse	ancient
1199	EU750722	27	A6	Sanfratellano	Europe
1200	KF192370	27	A6	Italian unspecified breed	Europe
1201	KU711285	27	A6	Grosseto province (Tuscany) and Viterbo province (Latium)	Europe
1202	KT368726	27	A6	Ancient	ancient
1203	DQ007577	27	A6	North East Siberia ancient	ancient
1204	DQ328043	27	A6	Yakut	West Asia
1205	JQ936388	27	A6	Eurasian unspecified horse	West Asia
1206	AF168691	27	A6	Lipizzan breed	Europe
1207	KC147183	27	A6	West Europe unspecified horse	Europe
1208	HQ439471	27	A6	Kladruber	Europe
1209	JQ950359	27	A6	Czech native horse	Europe
1210	KJ741686	28	A6	North unspecified breed	Europe
1211	EF433393	28	A6	Pinias	Europe
1212	EU203767	28	A6	Guizhou horse	East Asia
1213	EU203774	28	A6	Guizhou horse	East Asia
1214	EU203828	28	A6	Hasake horse	East Asia
1215	EU433688	28	A6	East asia unspecified horse	East Asia
1216	EU433727	28	A6	East asia unspecified horse	East Asia
1217	EU433757	28	A6	East asia unspecified horse	East Asia
1218	EU433811	28	A6	East asia unspecified horse	East Asia
1219	EU433813	28	A6	East asia unspecified horse	East Asia
1220	EU433827	28	A6	East asia unspecified horse	East Asia
1221	EU931604	28	A6	Asia ancient horse	ancient
1222	EU939445	28	A6	Debao horse	East Asia
1223	GU734783	28	A6	East asia unspecified horse	East Asia
1224	JQ360642	28	A6	East asia unspecified horse	East Asia
1225	JQ360668	28	A6	East asia unspecified horse	East Asia
1226	JQ360695	28	A6	East asia unspecified horse	East Asia
1227	JQ936336	28	A6	Mongolian horse	East Asia
1228	KT167230	28	A6	East asia unspecified horse	East Asia
1229	KT211132	28	A6	China native horse	East Asia
1230	JN570958	28	A6	Ancient horse	ancient
1231	KU711292	28	A6	Maremmano	Europe
1232	EU433840	28	A6	India native horse	East Asia
1233	DQ007580	28	A6	North East Siberia horse	ancient
1234	JQ936347	28	A6	Eurosian unspecified horse	West Asia
1235	JQ936348	28	A6	Eurosian unspecified horse	West Asia
1236	JQ936432	28	A6	Eurosian unspecified horse	West Asia
1237	EU256611	28	A6	Pura Raza Espanola PRE	Europe
1238	GU563668	28	A6	West Europe unspecified horse	Europe
1239	AJ413734	28	A6	Konik	Europe
1240	EU559582	28	A6	Europe ancient horse	ancient
1241	JQ950356	28	A6	Czech native horse	Europe
1242	DQ327956	28	A6	Akhal-Teke	West Asia
1243	DQ327964	28	A6	Akhal-Teke	West Asia
1244	EU093046	28	A6	Turkoman Akhal-Teke	West Asia
1245	EU433714	32	A6	East asia unspecified horse	East Asia
1246	EU433755	32	A6	East asia unspecified horse	East Asia
1247	EU433801	32	A6	East asia unspecified horse	East Asia
1248	EU433803	32	A6	East asia unspecified horse	East Asia
1249	EU931601	32	A6	Asia ancient horse	ancient
1250	EU931609	32	A6	Asia ancient horse	ancient
1251	JQ360684	32	A6	East asia unspecified horse	East Asia
1252	JQ360705	32	A6	East asia unspecified horse	East Asia
1253	JQ360707	32	A6	East asia unspecified horse	East Asia
1254	JQ360719	32	A6	East asia unspecified horse	East Asia
1255	JQ360720	32	A6	East asia unspecified horse	East Asia
1256	JQ360724	32	A6	East asia unspecified horse	East Asia
1257	JN570972	32	A6	Ancient horse	ancient
1258	DQ328023	32	A6	Vyatskaya	West Asia
1259	DQ328033	32	A6	Vyatskaya	West Asia
1260	KT368738	32	A6	Yakut	West Asia
1261	JN210989	32	A6	Iranian unspecified breed	West Asia
1262	AJ413922	32	A6	Trakehner	Europe
1263	JN398385	32	A6	Akhal-Teke	West Asia
1264	AJ413829	34	A6	Oldenburger	Europe
1265	HM483982	34	A6	west asia unspecified horse	West Asia
1266	JN210973	34	A6	Iranian unspecified breed	West Asia
1267	JN570945	34	A6	Ancient horse	ancient
1268	AY246195	35	A6	Caspian	West Asia
1269	EF437565	35	A6	Polish Arabian horses	West Asia
1270	EU433788	35	A6	East asia unspecified horse	East Asia
1271	FJ392578	35	A6	Debao horse	East Asia
1272	HQ592935	35	A6	Eurosian unspecified horse	West Asia
1273	JN398384	35	A6	Unspecified Iranian Breed	West Asia
1274	JQ340110	35	A6	East asia unspecified horse	East Asia
1275	JQ360729	35	A6	East asia unspecified horse	East Asia
1276	KC147110	35	A6	Middle Europe unspecified horse	Europe
1277	KC147111	35	A6	Middle Europe unspecified horse	Europe
1278	KC147200	35	A6	West Europe unspecified horse	Europe
1279	KT368757	35	A6	Equus przewalskii	West Asia
1280	KT167216	35	A6	East asia unspecified horse	East Asia
1281	KT211125	35	A6	Jinjiang	East Asia
1282	KU711168	35	A6	Esperia	Europe
1283	HE572595	40	A6	South Asia unspecified horse	East Asia
1284	JN398397	40	A6	Maremmano	Europe
1285	JQ360811	40	A6	east asia unspecified horse	East Asia
1286	KF192372	40	A6	Italian unspecified breed	Europe
1287	KU711329	40	A6	Maremmano	Europe
1288	EF433392	41	A6	Pinias	Europe
1289	FJ204354	41	A6	Ukraine (Peninsula Crimea)	ancient
1290	KP731343	41	A6	Lipizzan	Europe
1291	AB329591	41	A6	Noma native horse	East Asia
1292	AB329592	41	A6	Mongolian horse	East Asia
1293	EU203852	41	A6	Naqu horse	East Asia
1294	EU433743	41	A6	East asia unspecified horse	East Asia
1295	EU433744	41	A6	East asia unspecified horse	East Asia
1296	EU931594	41	A6	Asia ancient horse	ancient
1297	JN790892	41	A6	Mongolian horse	East Asia
1298	JQ360809	41	A6	East asia unspecified horse	East Asia
1299	KT167254	41	A6	East asia unspecified horse	East Asia
1300	AY519923	41	A6	Garrano	Europe
1301	KF192373	41	A6	Italian unspecified breed	Europe
1302	KF192374	41	A6	Italian unspecified breed	Europe
1303	AY057423	41	A6	Lipizzan	Europe
1304	AY805662	41	A6	Pura Raza Espanola	Europe
1305	AF132576	41	A6	Arabian	West Asia
1306	AF132577	41	A6	Arabian	West Asia
1307	AJ413608	41	A6	Arab-Barb-cross	West Asia
1308	AJ413857	41	A6	Rottaler	Europe
1309	AY575116	41	A6	Lithuanian Heavy Drought	Europe
1310	HQ439487	41	A6	Black Forest	Europe
1311	KC147099	41	A6	Middle Europe unspecified horse	Europe
1312	KC147100	41	A6	Middle Europe unspecified horse	Europe
1313	AJ876886	41	A6	Kazakhstan ancient horse	ancient
1314	JN210975	43	A6	Iranian unspecified breed	West Asia
1315	JN790872	44	A6	Mongolia horse	East Asia
1316	JQ360792	44	A6	east asia unspecified horse	East Asia
1317	KT167315	44	A6	east asia unspecified horse	East Asia
1318	KT211210	44	A6	China native horse	East Asia
1319	KT167260	45	A6	east asia unspecified horse	East Asia
1320	EU433816	46	A6	east asia unspecified horse	East Asia
1321	GU734779	46	A6	east asia unspecified horse	East Asia
1322	KT167296	46	A6	east asia unspecified horse	East Asia
1323	KT211147	46	A6	China native horse	East Asia
1324	EU433737	130	A6	east asia unspecified horse	East Asia
1325	JQ360815	130	A6	east asia unspecified horse	East Asia
1326	KT167284	130	A6	east asia unspecified horse	East Asia
1327	KT211118	130	A6	China native horse	East Asia
1328	AJ413920	164	A6	Shetland Pony	Europe
1329	EU093057	164	A6	Turkoman Akhal-Teke	West Asia
1330	DQ683539	201	A6	Iberian Peninsula	ancient
1331	FJ204383	201	A6	Iberian Peninsula	ancient
1332	HM802280	201	A6	ancient europe	ancient
1333	FJ204390	232	A6	Iberian Peninsula	ancient
1334	JQ360780	232	A6	East asia unspecified horse	East Asia
1335	MG001432	243	A6	China native horse	East Asia
1336	KT757743	244	A6	ancient horse	ancient
1337	KT368731	244	A6	ancient horse	ancient
1338	DQ328039	244	A6	Yakut	West Asia
1339	DQ328041	244	A6	Yakut	West Asia
1340	DQ328055	244	A6	Yakut	West Asia
1341	DQ327846	245	A6	Guanshan horse	East Asia
1342	EU433751	245	A6	East asia unspecified horse	East Asia
1343	JN224844	245	A6	Mongolian horse	East Asia
1344	JN398396	245	A6	Suffolk Punch	Europe
1345	JQ340102	245	A6	East asia unspecified horse	East Asia
1346	KT757756	253	A6	ancient horse	ancient
1347	JN570977	253	A6	tarpan	ancient
1348	KT368756	270	A6	Przewalski's horse	West Asia
1349	KT368755	270	A6	Przewalski's horse	West Asia
1350	KT368752	270	A6	Przewalski's horse	West Asia
1351	KT368751	270	A6	Przewalski's horse	West Asia
1352	KT368750	270	A6	Przewalski's horse	West Asia
1353	KT368749	270	A6	Przewalski's horse	West Asia
1354	JQ360822	270	A6	East Asian horse	East Asia
1355	JX032646	270	A6	Przewalski's horse	West Asia
1356	AP012269	270	A6	Przewalski's horse	West Asia
1357	AY057424	292	A6	Lipizzan	Europe
1358	KP731344	292	A6	Lipizzan	Europe
1359	KP731345	292	A6	Lipizzan	Europe
1360	KP731354	293	A6	Lipizzan	Europe
1361	KP731355	293	A6	Lipizzan	Europe
1362	KM234981	298	A6	Mongolia	East Asia
1363	JQ520289	299	A6	east europe unspecified horse	Europe
1364	KP212434	299	A6	Middle europe unspecified horse	Europe
1365	EU433814	307	A6	east asia unspecified horse	East Asia
1366	JQ360697	308	A6	East asia unspecified horse	East Asia
1367	JQ936343	308	A6	Eurasian unspecified horse	West Asia
1368	DQ328053	310	A6	Yakut	West Asia
1369	EU433775	310	A6	east asia unspecified horse	East Asia
1370	AF132589	321	A6	Arabian	West Asia
1371	AF465997	321	A6	Arabian	West Asia
1372	DQ007582	330	A6	North East Siberia ancient	ancient
1373	JN570964	332	A6	tarpan	ancient
1374	JQ936466	357	A6	Eurasian unspecified horse	West Asia
1375	JQ936371	359	A6	Eurasian unspecified horse	West Asia
1376	JQ936376	361	A6	Eurasian unspecified horse	West Asia
1377	JQ936377	361	A6	Eurasian unspecified horse	West Asia
1378	JQ936342	362	A6	Eurasian unspecified horse	West Asia
1379	DQ683538	370	A6	Iberian Peninsula ancient	ancient
1380	FJ204380	374	A6	Iberian Peninsula	ancient
1381	FJ204381	375	A6	Iberian Peninsula	ancient
1382	FJ204386	375	A6	Iberian Peninsula	ancient
1383	FJ204387	375	A6	Iberian Peninsula	ancient
1384	KC840713	381	A6	Middle east unspecified horse	West Asia
1385	KC840726	381	A6	Middle east unspecified horse	West Asia
1386	KC840731	381	A6	Middle east unspecified horse	West Asia
1387	KC840745	381	A6	Middle east unspecified horse	West Asia
1388	KC840752	381	A6	Middle east unspecified horse	West Asia
1389	KC840772	381	A6	Middle east unspecified horse	West Asia
1390	KC840773	381	A6	Middle east unspecified horse	West Asia
1391	KC840777	381	A6	Middle east unspecified horse	West Asia
1392	KC840703	382	A6	Middle east unspecified horse	West Asia
1393	KC840757	382	A6	Middle east unspecified horse	West Asia
1394	KC840762	382	A6	Middle east unspecified horse	West Asia
1395	KC840758	384	A6	Arabian horse	West Asia
1396	KC840727	384	A6	Arabian horse	West Asia
1397	KC840709	393	A6	Middle east unspecified horse	West Asia
1398	KC840753	393	A6	Middle east unspecified horse	West Asia
1399	KC840764	393	A6	Middle east unspecified horse	West Asia
1400	EU203776	122	A7	Guizhou horse	East Asia
1401	EU433705	122	A7	East asia unspecified horse	East Asia
1402	EU433763	122	A7	East asia unspecified horse	East Asia
1403	JQ340108	122	A7	East asia unspecified horse	East Asia
1404	KT167231	122	A7	East asia unspecified horse	East Asia
1405	KT211096	122	A7	China native horse	East Asia
1406	KT211214	122	A7	China native horse	East Asia
1407	KU711115	122	A7	Arabian horse	West Asia
1408	AY246231	122	A7	Garrano	Europe
1409	AY519916	122	A7	Garrano	Europe
1410	KC527024	122	A7	South Europe unspecified horse	Europe
1411	KU711120	122	A7	Bardigiano	Europe
1412	HE565889	122	A7	South Asia unspecified horse	East Asia
1413	AJ413656	122	A7	Arabian	West Asia
1414	EU433778	123	A7	East asia unspecified horse	East Asia
1415	KT167317	123	A7	East asia unspecified horse	East Asia
1416	KT211216	123	A7	Chian native horse	East Asia
1417	EU203761	124	A7	Guizhou horse	East Asia
1418	KT167229	124	A7	East asia unspecified horse	East Asia
1419	HM484037	125	A7	west asia unspecified horse	West Asia
1420	KT985981	125	A7	Russian unspecified Horse	West Asia
1421	KT985982	125	A7	Eurosian unspecified horse	West Asia
1422	JN398401	126	A7	Maremmano	Europe
1423	JQ520292	126	A7	East europe unspecified horse	Europe
1424	JQ520309	126	A7	East europe unspecified horse	Europe
1425	DQ986478	126	A7	tibet horse	East Asia
1426	EU433740	126	A7	East asia unspecified horse	East Asia
1427	FJ204326	126	A7	West Siberia ancient horse	ancient
1428	GQ203133	126	A7	Baise horse	East Asia
1429	GQ203135	126	A7	Baise horse	East Asia
1430	MG001428	126	A7	East asia unspecified horse	East Asia
1431	JN790899	126	A7	Mongolian horse	East Asia
1432	JQ340127	126	A7	East asia unspecified horse	East Asia
1433	JQ360651	126	A7	East asia unspecified horse	East Asia
1434	KT167280	126	A7	East asia unspecified horse	East Asia
1435	KT211111	126	A7	China native horse	East Asia
1436	KU711114	126	A7	Arabian horse	West Asia
1437	KU711116	126	A7	Arabian horse	West Asia
1438	JF804138	126	A7	Italian unspecified breed	Europe
1439	KF192396	126	A7	Italian unspecified breed	Europe
1440	KF192397	126	A7	Italian unspecified breed	Europe
1441	KU711121	126	A7	Bardigiano	Europe
1442	KU711200	126	A7	Giara	Europe
1443	KU711202	126	A7	Giara	Europe
1444	KU711203	126	A7	Giara	Europe
1445	KU711204	126	A7	Giara	Europe
1446	KU711207	126	A7	Giara	Europe
1447	KU711307	126	A7	Maremmano	Europe
1448	KU711415	126	A7	Sarcidano	Europe
1449	KU711487	126	A7	Tolfetano	Europe
1450	KU711492	126	A7	Tolfetano	Europe
1451	HE565675	126	A7	South Asia unspecified horse	East Asia
1452	HE580461	126	A7	South Asia unspecified horse	East Asia
1453	DQ328012	126	A7	Orlov	West Asia
1454	DQ328056	126	A7	Yakut	West Asia
1455	JQ936357	126	A7	Eurosian unspecified horse	West Asia
1456	JQ936423	126	A7	Eurosian unspecified horse	West Asia
1457	AF447765	126	A7	Sorraia	Europe
1458	AJ413904	126	A7	Sorraia	Europe
1459	AJ413905	126	A7	Sorraia	Europe
1460	AJ413906	126	A7	Sorraia	Europe
1461	AJ413907	126	A7	Sorraia	Europe
1462	AJ413908	126	A7	Sorraia	Europe
1463	AJ413909	126	A7	Sorraia	Europe
1464	AJ413917	126	A7	Sorraia	Europe
1465	AY246261	126	A7	Sorraia	Europe
1466	AY246262	126	A7	Sorraia	Europe
1467	AY246263	126	A7	Sorraia	Europe
1468	AY519942	126	A7	Marismeno	Europe
1469	AY519944	126	A7	Marismeno	Europe
1470	HQ827142	126	A7	West Europe unspecified horse	Europe
1471	HQ827163	126	A7	West Europe unspecified horse	Europe
1472	KP203293	126	A7	South Europe unspecified horse	Europe
1473	KC143351	126	A7	Middle Europe unspecified horse	Europe
1474	AY575106	127	A7	Gotland	Europe
1475	KP731346	127	A7	Lipizzan	Europe
1476	KP731347	127	A7	Lipizzan	Europe
1477	AF354431	127	A7	Jeju	East Asia
1478	EU203817	127	A7	Hasake horse	East Asia
1479	JQ360664	127	A7	East asia unspecified horse	East Asia
1480	KT167243	127	A7	East asia unspecified horse	East Asia
1481	HE565681	127	A7	India native horse	East Asia
1482	HE565693	127	A7	India native horse	East Asia
1483	AY246200	127	A7	Caspian	West Asia
1484	DQ328040	127	A7	Yakut	West Asia
1485	DQ328047	127	A7	Yakut	West Asia
1486	DQ328048	127	A7	Yakut	West Asia
1487	HQ592936	127	A7	Caspian horse	West Asia
1488	AY057419	127	A7	Lipizzan	Europe
1489	HQ592852	127	A7	Haflinger horse	Europe
1490	EU203728	128	A7	Guanzhong horse	East Asia
1491	EU433780	128	A7	East asia unspecified horse	East Asia
1492	HQ592824	176	A7	Caspian horse	West Asia
1493	KF849289	176	A7	Russian unspecified Horse	West Asia
1494	FJ204318	206	A7	Mogolian horse ancient	ancient
1495	FJ204324	206	A7	Russian ancient horse	ancient
1496	DQ900922	225	A7	Asia ancient horse	ancient
1497	DQ900923	225	A7	Asia ancient horse	ancient
1498	DQ900925	225	A7	Asia ancient horse	ancient
1499	KC840706	380	A7	Middle east unspecified horse	West Asia
1500	KC840766	380	A7	Middle east unspecified horse	West Asia
1501	KC840769	380	A7	Middle east unspecified horse	West Asia
1502	EU433728	54	B1	East asia unspecified horse	East Asia
1503	FJ502838	54	B1	East asia unspecified horse	East Asia
1504	JQ340143	54	B1	East asia unspecified horse	East Asia
1505	JQ360764	54	B1	East asia unspecified horse	East Asia
1506	KT167203	54	B1	East asia unspecified horse	East Asia
1507	KT211161	54	B1	Jiangzi	East Asia
1508	HQ439463	55	B1	Norwegian Fjord	Europe
1509	JF951841	55	B1	North europe unspecified horse	Europe
1510	KP731340	55	B1	Lipizzan	Europe
1511	JQ360784	55	B1	East asia unspecified horse	East Asia
1512	KT167323	55	B1	East asia unspecified horse	East Asia
1513	KT211199	55	B1	China native horse	East Asia
1514	KU711090	55	B1	Arabian horse	West Asia
1515	KU711092	55	B1	Arabian horse	West Asia
1516	KU711099	55	B1	Arabian horse	West Asia
1517	EU750719	55	B1	Sicilian Indigenous	Europe
1518	KU601722	55	B1	South Europe unspecified horse	Europe
1519	KC202973	55	B1	Eurosian unspecified horse	West Asia
1520	KC202974	55	B1	Eurosian unspecified horse	West Asia
1521	KC202976	55	B1	Eurosian unspecified horse	West Asia
1522	KC202978	55	B1	Eurosian unspecified horse	West Asia
1523	KC202981	55	B1	Eurosian unspecified horse	West Asia
1524	KC202975	55	B1	Thoroughbred	Europe
1525	KF849286	55	B1	Eurosian unspecified horse	West Asia
1526	AB329599	55	B1	Thoroughbred	Europe
1527	AF168693	55	B1	Lipizzan breed	Europe
1528	AJ413897	55	B1	Shire	Europe
1529	AY462444	55	B1	thoroughbred	Europe
1530	AY805655	55	B1	Pura Raza Espanola	Europe
1531	AY805660	55	B1	Pura Raza Espanola	Europe
1532	EU580150	55	B1	thoroughbred	Europe
1533	HM581895	55	B1	British horse	Europe
1534	HQ848984	55	B1	West Europe unspecified horse	Europe
1535	JQ229827	55	B1	Spanish native horse	Europe
1536	KJ917270	55	B1	West Europe unspecified horse	Europe
1537	KJ917298	55	B1	West Europe unspecified horse	Europe
1538	KJ917300	55	B1	West Europe unspecified horse	Europe
1539	KJ917303	55	B1	West Europe unspecified horse	Europe
1540	KJ917307	55	B1	West Europe unspecified horse	Europe
1541	AF072989	55	B1	Arab horse	West Asia
1542	AF132584	55	B1	Arabian	West Asia
1543	JN211006	55	B1	Iranian unspecified breed	West Asia
1544	EU559580	55	B1	Europe ancient horse	ancient
1545	AY519893	214	B1	Caballo de Corro	Europe
1546	HQ827100	214	B1	West Europe unspecified horse	Europe
1547	KT368728	214	B1	Yakut	West Asia
1548	AF466015	219	B1	Mallorquina	Europe
1549	HQ827148	219	B1	West Europe unspecified horse	Europe
1550	HQ827151	219	B1	West Europe unspecified horse	Europe
1551	JQ229825	219	B1	Spanish native horse	Europe
1552	JQ360732	219	B1	East asia unspecified horse	East Asia
1553	KJ815028	233	B1	Itanlian unspecified horse	Europe
1554	KU601723	233	B1	South Asia unspecified horse	Europe
1555	HQ439496	255	B1	Welsh Cob (Section D)	Europe
1556	DQ327864	366	B1	Kerry Bog Pony	Europe
1557	DQ327916	366	B1	Irish Draught	Europe
1558	KC840711	379	B1	Middle east unspecified horse	West Asia
1559	KC840721	379	B1	Middle east unspecified horse	West Asia
1560	FJ204372	51	B2	Moldova ancient horse	ancient
1561	AF014405	51	B2	Jeju	East Asia
1562	AF354428	51	B2	Jeju	East Asia
1563	AF354430	51	B2	Jeju	East Asia
1564	AP013088	51	B2	Japanese native horse	East Asia
1565	AY246204	51	B2	Cheju	East Asia
1566	AY246207	51	B2	Cheju	East Asia
1567	DQ297635	51	B2	Sanhe horse	East Asia
1568	EU203752	51	B2	Guizhou horse	East Asia
1569	EU433690	51	B2	East asia unspecified horse	East Asia
1570	EU433754	51	B2	East asia unspecified horse	East Asia
1571	EU433817	51	B2	East asia unspecified horse	East Asia
1572	EU931607	51	B2	Asia ancient	ancient
1573	GU734784	51	B2	East asia unspecified horse	East Asia
1574	JQ340136	51	B2	East asia unspecified horse	East Asia
1575	JQ340148	51	B2	East asia unspecified horse	East Asia
1576	JQ360691	51	B2	East asia unspecified horse	East Asia
1577	KT167264	51	B2	East asia unspecified horse	East Asia
1578	KT211087	51	B2	China native horse	East Asia
1579	KU601724	51	B2	South Europe unspecified horse	Europe
1580	KU601725	51	B2	South Europe unspecified horse	Europe
1581	KU711440	51	B2	Sardinian Anglo-Arab	Europe
1582	KU711444	51	B2	Sardinian Anglo-Arab	Europe
1583	EU433843	51	B2	India native horse	East Asia
1584	HE572597	51	B2	South Asia unspecified horse	East Asia
1585	JQ936458	51	B2	Eurosian unspecified horse	West Asia
1586	JQ936465	51	B2	Eurosian unspecified horse	West Asia
1587	JQ936470	51	B2	Eurosian unspecified horse	West Asia
1588	KT368730	51	B2	Yakut	West Asia
1589	AF481252	51	B2	Connemara	Europe
1590	AF481245	51	B2	Anatolian	West Asia
1591	AF132586	51	B2	Arabian	West Asia
1592	AJ413636	51	B2	Arabian	West Asia
1593	JN210979	51	B2	Iranian unspecified breed	West Asia
1594	JN398415	51	B2	Unspecified Iranian Breed	West Asia
1595	JN398416	51	B2	Caspian Pony	West Asia
1596	KU569916	51	B2	Middle east unspecified horse	West Asia
1597	AY575119	51	B2	Polish Heavy	Europe
1598	EU559581	51	B2	Europe ancient horse	ancient
1599	DQ327958	51	B2	Akhal-Teke	West Asia
1600	EU093049	51	B2	Turkoman Akhal-Teke	West Asia
1601	JQ520272	52	B2	East europe unspecified horse	Europe
1602	JN224866	52	B2	Mongolian horse	East Asia
1603	JQ340151	52	B2	East asia unspecified horse	East Asia
1604	JQ340170	52	B2	East asia unspecified horse	East Asia
1605	JQ360659	52	B2	East asia unspecified horse	East Asia
1606	KC202971	52	B2	East asia unspecified horse	East Asia
1607	KC202972	52	B2	East asia unspecified horse	East Asia
1608	KT167209	52	B2	East asia unspecified horse	East Asia
1609	KT211157	52	B2	Xinan horse	East Asia
1610	KT211164	52	B2	Yanqi	East Asia
1611	KU711089	52	B2	Arabian horse	West Asia
1612	KU711102	52	B2	Arabian horse	West Asia
1613	KU711104	52	B2	Arabian horse	West Asia
1614	AY462423	52	B2	Italian Trotter	Europe
1615	AY462453	52	B2	Sarcidano	Europe
1616	JF804143	52	B2	Itanlian unspecified horse	Europe
1617	JF804144	52	B2	Itanlian unspecified horse	Europe
1618	JF804158	52	B2	Itanlian unspecified horse	Europe
1619	KF192377	52	B2	Itanlian unspecified horse	Europe
1620	KF192378	52	B2	Itanlian unspecified horse	Europe
1621	KR013117	52	B2	Itanlian unspecified horse	Europe
1622	KU711226	52	B2	Giara	Europe
1623	KU711357	52	B2	Monterufolino	Europe
1624	KU711452	52	B2	Sardinian Anglo-Arab	Europe
1625	KU711457	52	B2	Sardinian Anglo-Arab	Europe
1626	KU711458	52	B2	Sardinian Anglo-Arab	Europe
1627	KU711461	52	B2	Sardinian Anglo-Arab	Europe
1628	KU711462	52	B2	Sardinian Anglo-Arab	Europe
1629	KU711464	52	B2	Sardinian Anglo-Arab	Europe
1630	KU711468	52	B2	Sardinian Anglo-Arab	Europe
1631	KU711472	52	B2	Sardinian Anglo-Arab	Europe
1632	KU711479	52	B2	Sardinian Anglo-Arab	Europe
1633	KU711481	52	B2	Sardinian Anglo-Arab	Europe
1634	EU433848	52	B2	South Asia unspecified horse	East Asia
1635	HE572614	52	B2	South Asia unspecified horse	East Asia
1636	AF481332	52	B2	Tuva	West Asia
1637	DQ328005	52	B2	Orlov	West Asia
1638	DQ328010	52	B2	Orlov	West Asia
1639	DQ328011	52	B2	Orlov	West Asia
1640	KT985979	52	B2	Eurosian unspecified horse	West Asia
1641	AJ413623	52	B2	Andalusian	Europe
1642	AY057425	52	B2	Lipizzan	Europe
1643	AY519899	52	B2	Cartujano (Carthusian)	Europe
1644	AY519900	52	B2	Cartujano (Carthusian)	Europe
1645	AY519903	52	B2	Cartujano (Carthusian)	Europe
1646	AY519905	52	B2	Cartujano (Carthusian)	Europe
1647	AY519947	52	B2	Merens	Europe
1648	AY805647	52	B2	Pura Raza Espanola	Europe
1649	AY997165	52	B2	Pura Raza Espanola	Europe
1650	DQ327874	52	B2	Kerry Bog Pony	Europe
1651	DQ327904	52	B2	Irish Draught	Europe
1652	DQ327946	52	B2	Irish Draught	Europe
1653	EU256597	52	B2	Hispano-Breton	Europe
1654	EU580167	52	B2	thoroughbred	Europe
1655	HQ439497	52	B2	Welsh Cob (Section A)	Europe
1656	HQ439499	52	B2	Welsh Cob (Section B)	Europe
1657	HQ592892	52	B2	Welsh horse	Europe
1658	HQ827112	52	B2	West Europe unspecified horse	Europe
1659	HQ827158	52	B2	West Europe unspecified horse	Europe
1660	HQ849046	52	B2	West Europe unspecified horse	Europe
1661	HQ849047	52	B2	West Europe unspecified horse	Europe
1662	HQ849049	52	B2	West Europe unspecified horse	Europe
1663	HQ849050	52	B2	West Europe unspecified horse	Europe
1664	HQ849051	52	B2	West Europe unspecified horse	Europe
1665	HQ849052	52	B2	West Europe unspecified horse	Europe
1666	HQ849053	52	B2	West Europe unspecified horse	Europe
1667	HQ849054	52	B2	West Europe unspecified horse	Europe
1668	HQ849055	52	B2	West Europe unspecified horse	Europe
1669	HQ849056	52	B2	West Europe unspecified horse	Europe
1670	HQ849057	52	B2	West Europe unspecified horse	Europe
1671	HQ849058	52	B2	West Europe unspecified horse	Europe
1672	HQ849059	52	B2	West Europe unspecified horse	Europe
1673	KJ917291	52	B2	West Europe unspecified horse	Europe
1674	KU711231	52	B2	Lipizzan	Europe
1675	KU711232	52	B2	Lipizzan	Europe
1676	KU711235	52	B2	Lipizzan	Europe
1677	KU711236	52	B2	Lipizzan	Europe
1678	KU711241	52	B2	Lipizzan	Europe
1679	KU711245	52	B2	Lipizzan	Europe
1680	KU711253	52	B2	Lipizzan	Europe
1681	AF481236	52	B2	Anatolian	West Asia
1682	AF132585	52	B2	Arabian	West Asia
1683	AF466000	52	B2	Arabian	West Asia
1684	AJ413631	52	B2	Arabian	West Asia
1685	AJ413632	52	B2	Arabian	West Asia
1686	AJ413634	52	B2	Arabian	West Asia
1687	EF437558	52	B2	Polish Arabian horses	West Asia
1688	JN210995	52	B2	Iranian unspecified breed	West Asia
1689	KU569910	52	B2	Middle east unspecified horse	West Asia
1690	KC202972	52	B2	Thoroughbred	Europe
1691	AJ413707	52	B2	Holsteiner	Europe
1692	AJ413711	52	B2	Holsteiner	Europe
1693	AJ413826	52	B2	Noriker	Europe
1694	AJ413835	52	B2	Rhineland Heavy Draft	Europe
1695	AJ413838	52	B2	Rhineland Heavy Draft	Europe
1696	AJ413839	52	B2	Rhineland Heavy Draft	Europe
1697	AJ413840	52	B2	Rhineland Heavy Draft	Europe
1698	AJ413841	52	B2	Rhineland Heavy Draft	Europe
1699	AJ413844	52	B2	Rhineland Heavy Draft	Europe
1700	HQ439480	52	B2	Noriker	Europe
1701	KP212456	52	B2	Middle Europe unspecified horse	Europe
1702	AJ876888	52	B2	Kazakhstan ancient horse	ancient
1703	EU093062	52	B2	Turkoman Akhal-Teke	West Asia
1704	JQ360716	56	B2	East asia unspecified horse	East Asia
1705	KT167286	56	B2	East asia unspecified horse	East Asia
1706	KT211126	56	B2	China native horse	East Asia
1707	JF804145	56	B2	Itanlian unspecified horse	Europe
1708	KF192376	56	B2	Itanlian unspecified horse	Europe
1709	KU711142	56	B2	Bardigiano	Europe
1710	KU711166	56	B2	Esperia	Europe
1711	KU711167	56	B2	Esperia	Europe
1712	KU711180	56	B2	Esperia	Europe
1713	KU711477	56	B2	Sardinian Anglo-Arab	Europe
1714	KU711478	56	B2	Sardinian Anglo-Arab	Europe
1715	AY246198	56	B2	Caspian	West Asia
1716	HQ592823	56	B2	Caspian	West Asia
1717	HQ592826	56	B2	Caspian	West Asia
1718	AJ413705	56	B2	Friesian	Europe
1719	AY246218	56	B2	Clydesdale	Europe
1720	DQ327945	56	B2	Irish Draught	Europe
1721	HQ593011	56	B2	Standardbred	Europe
1722	HQ593049	56	B2	Clydesdale	Europe
1723	HQ593050	56	B2	Clydesdale	Europe
1724	AF132594	56	B2	Arabian	West Asia
1725	KC143346	56	B2	Middle Europe unspecified horse	Europe
1726	KP731348	57	B2	Lipizzan	Europe
1727	JN224846	57	B2	Mongolian horse	East Asia
1728	JQ340099	57	B2	East asia unspecified horse	East Asia
1729	JQ360671	57	B2	East asia unspecified horse	East Asia
1730	KT167301	57	B2	East asia unspecified horse	East Asia
1731	KT211155	57	B2	China native horse	East Asia
1732	KU601726	57	B2	South Europe unspecified horse	Europe
1733	KU711136	57	B2	Bardigiano	Europe
1734	KU711442	57	B2	Sardinian Anglo-Arab	Europe
1735	EU433847	57	B2	South Asia unspecified horse	East Asia
1736	DQ327969	57	B2	Mesenskay	West Asia
1737	DQ327975	57	B2	Mesenskay	West Asia
1738	DQ327977	57	B2	Mesenskay	West Asia
1739	DQ327978	57	B2	Mesenskay	West Asia
1740	DQ327980	57	B2	Mesenskay	West Asia
1741	AB329601	57	B2	Throughbred	Europe
1742	AY057426	57	B2	Lipizzan	Europe
1743	AY519928	57	B2	Losino	Europe
1744	AY519929	57	B2	Losino	Europe
1745	EF014970	57	B2	Hispano-Breton	Europe
1746	EU256582	57	B2	Hispano-Breton	Europe
1747	HQ827108	57	B2	West Europe unspecified horse	Europe
1748	AJ413644	57	B2	Arabian	West Asia
1749	AJ413647	57	B2	Arabian	West Asia
1750	EF437566	57	B2	Polish Arabian horses	West Asia
1751	JN398414	57	B2	Unspecified Iranian Breed	West Asia
1752	HQ439476	57	B2	Kustanai	West Asia
1753	AF014413	58	B2	Mongolian horse	East Asia
1754	AF354441	58	B2	Jeju	East Asia
1755	AP013094	58	B2	Japanese native horse	East Asia
1756	JF951840	58	B2	North europe unspecified horse	Europe
1757	KF038161	58	B2	Jeju	East Asia
1758	KT167258	58	B2	East asia unspecified horse	East Asia
1759	KT368742	58	B2	Przewalski's horse	West Asia
1760	KT368743	58	B2	Przewalski's horse	West Asia
1761	AJ413692	162	B2	Exmoor	Europe
1762	AJ413693	162	B2	Exmoor	Europe
1763	AY246221	162	B2	Exmoor	Europe
1764	AY246224	162	B2	Exmoor	Europe
1765	HQ592971	162	B2	Exmoor	Europe
1766	FJ204317	204	B2	Mongolia wild horse	ancient
1767	KF192375	283	B2	Itanlian unspecified horse	Europe
1768	KU711150	283	B2	Bardigiano	Europe
1769	KU711190	284	B2	Esperia	Europe
1770	KU711197	284	B2	Giara	Europe
1771	GU563633	29	B3	West Europe unspecified horse	Europe
1772	GU563639	29	B3	West Europe unspecified horse	Europe
1773	GU563640	29	B3	West Europe unspecified horse	Europe
1774	HQ592856	29	B3	Fell	Europe
1775	JN211007	29	B3	Iranian unspecified breed	West Asia
1776	JQ360709	29	B3	East asia unspecified horse	East Asia
1777	HM581903	53	B3	British horse	Europe
1778	JN398417	53	B3	Trakhener	Europe
1779	AP013100	53	B3	Japanese native horse	East Asia
1780	DQ297625	53	B3	Mogolian horse ancient	ancient
1781	JQ340097	53	B3	East asia unspecified horse	East Asia
1782	JQ360728	53	B3	East asia unspecified horse	East Asia
1783	KT167268	53	B3	East asia unspecified horse	East Asia
1784	KT211198	53	B3	Chian native horse	East Asia
1785	KU711082	53	B3	Arabian horse	West Asia
1786	KF192379	53	B3	South Europe unspecified horse	Europe
1787	KU711123	53	B3	Bardigiano	Europe
1788	AB329602	53	B3	Throughbred	Europe
1789	AF072990	53	B3	Thoroughbred horse	Europe
1790	AF481308	53	B3	Thoroughbred	Europe
1791	AF481315	53	B3	Thoroughbred	Europe
1792	AF481317	53	B3	Thoroughbred	Europe
1793	AY246214	53	B3	Clydesdale	Europe
1794	AY246270	53	B3	thoroughbred	Europe
1795	EU580154	53	B3	thoroughbred	Europe
1796	HE575414	53	B3	West Europe unspecified horse	Europe
1797	HE575421	53	B3	West Europe unspecified horse	Europe
1798	HQ593004	53	B3	Standardbred	Europe
1799	HQ593005	53	B3	Standardbred	Europe
1800	HQ849062	53	B3	West Europe unspecified horse	Europe
1801	KC202970	53	B3	West Europe unspecified horse	Europe
1802	KC202977	53	B3	West Europe unspecified horse	Europe
1803	KC202979	53	B3	West Europe unspecified horse	Europe
1804	KC202980	53	B3	West Europe unspecified horse	Europe
1805	KC202969	53	B3	Thoroughbred	Europe
1806	KC202982	53	B3	Thoroughbred	Europe
1807	KC202982	53	B3	West Europe unspecified horse	Europe
1808	KC202983	53	B3	West Europe unspecified horse	Europe
1809	KC202984	53	B3	West Europe unspecified horse	Europe
1810	KJ917258	53	B3	West Europe unspecified horse	Europe
1811	KJ917263	53	B3	West Europe unspecified horse	Europe
1812	KJ917275	53	B3	West Europe unspecified horse	Europe
1813	KJ917283	53	B3	West Europe unspecified horse	Europe
1814	KJ917290	53	B3	West Europe unspecified horse	Europe
1815	KJ917306	53	B3	West Europe unspecified horse	Europe
1816	EU203822	59	B3	Hasake horse	East Asia
1817	HE580445	59	B3	South Asia unspecified horse	East Asia
1818	HE580446	59	B3	South Asia unspecified horse	East Asia
1819	HE580450	59	B3	South Asia unspecified horse	East Asia
1820	JQ950360	59	B3	Czech native horse	Europe
1821	KT167247	59	B3	East asia unspecified horse	East Asia
1822	KU711198	282	B3	Giara	Europe
1823	KU711213	282	B3	Giara	Europe
1824	KU711218	282	B3	Giara	Europe
1825	KU711222	282	B3	Giara	Europe
1826	KU711223	282	B3	Giara	Europe
1827	KU711224	282	B3	Giara	Europe
1828	KU711290	282	B3	Maremmano	Europe
1829	KU711332	282	B3	Maremmano	Europe
1830	KU711491	282	B3	Tolfetano	Europe
1831	KU711494	282	B3	Tolfetano	Europe
1832	EU433710	311	B3	east asia unspecified horse	East Asia
1833	KC840701	378	B3	Arabian horse	West Asia
1834	KC840732	378	B3	Middle east unspecified horse	West Asia
1835	KC840779	378	B3	Middle east unspecified horse	West Asia
1836	KC840792	378	B3	Middle east unspecified horse	West Asia
1837	AF072988	15	C1	Icelandic horse	Europe
1838	AF326676	15	C1	Europe ancient horse	ancient
1839	AJ413701	15	C1	Norwegian Fjord	Europe
1840	AJ413703	15	C1	Norwegian Fjord	Europe
1841	AJ413721	15	C1	Icelandic Pony	Europe
1842	HQ153711	15	C1	North europe unspecified horse	Europe
1843	HQ153718	15	C1	North europe unspecified horse	Europe
1844	HQ153720	15	C1	North europe unspecified horse	Europe
1845	HQ153721	15	C1	North europe unspecified horse	Europe
1846	HQ153741	15	C1	North europe unspecified horse	Europe
1847	HQ439466	15	C1	Icelandic horse	Europe
1848	HQ592881	15	C1	Icelandic	Europe
1849	HQ592900	15	C1	Newfoundland	Europe
1850	JF951844	15	C1	North europe unspecified horse	Europe
1851	JN398439	15	C1	Clydesdale	Europe
1852	KJ741423	15	C1	North europe unspecified horse	Europe
1853	KJ741430	15	C1	North europe unspecified horse	Europe
1854	KJ741445	15	C1	North europe unspecified horse	Europe
1855	KJ741449	15	C1	North europe unspecified horse	Europe
1856	KJ741472	15	C1	North europe unspecified horse	Europe
1857	KJ741473	15	C1	North europe unspecified horse	Europe
1858	KJ741480	15	C1	North europe unspecified horse	Europe
1859	KJ741496	15	C1	North europe unspecified horse	Europe
1860	KJ741517	15	C1	North europe unspecified horse	Europe
1861	KJ741545	15	C1	North europe unspecified horse	Europe
1862	KJ741556	15	C1	North europe unspecified horse	Europe
1863	KJ741562	15	C1	North europe unspecified horse	Europe
1864	KJ741576	15	C1	North europe unspecified horse	Europe
1865	KJ741577	15	C1	North europe unspecified horse	Europe
1866	KJ741587	15	C1	North europe unspecified horse	Europe
1867	KJ741607	15	C1	North europe unspecified horse	Europe
1868	KJ741611	15	C1	North europe unspecified horse	Europe
1869	KJ741619	15	C1	North europe unspecified horse	Europe
1870	KJ741625	15	C1	North europe unspecified horse	Europe
1871	KJ741629	15	C1	North europe unspecified horse	Europe
1872	KJ741630	15	C1	North europe unspecified horse	Europe
1873	KJ741639	15	C1	North europe unspecified horse	Europe
1874	KJ741642	15	C1	North europe unspecified horse	Europe
1875	KJ741643	15	C1	North europe unspecified horse	Europe
1876	KJ741655	15	C1	North europe unspecified horse	Europe
1877	KJ741663	15	C1	North europe unspecified horse	Europe
1878	KJ741684	15	C1	North europe unspecified horse	Europe
1879	KJ741710	15	C1	North europe unspecified horse	Europe
1880	KJ741743	15	C1	North europe unspecified horse	Europe
1881	KJ741750	15	C1	North europe unspecified horse	Europe
1882	KJ741757	15	C1	North europe unspecified horse	Europe
1883	KJ741771	15	C1	North europe unspecified horse	Europe
1884	KJ741785	15	C1	North europe unspecified horse	Europe
1885	KJ741802	15	C1	North europe unspecified horse	Europe
1886	KJ741818	15	C1	North europe unspecified horse	Europe
1887	KJ741826	15	C1	North europe unspecified horse	Europe
1888	KJ741828	15	C1	North europe unspecified horse	Europe
1889	KJ741831	15	C1	North europe unspecified horse	Europe
1890	KT757760	15	C1	Norwegian Fjord	Europe
1891	EF433386	15	C1	Pindos	Europe
1892	FJ204360	15	C1	Ukraine ancient horse	ancient
1893	JQ520260	15	C1	East europe unspecified horse	Europe
1894	JQ520263	15	C1	East europe unspecified horse	Europe
1895	JQ520266	15	C1	East europe unspecified horse	Europe
1896	JQ520267	15	C1	East europe unspecified horse	Europe
1897	JQ520291	15	C1	East europe unspecified horse	Europe
1898	JQ520297	15	C1	East europe unspecified horse	Europe
1899	JQ520312	15	C1	East europe unspecified horse	Europe
1900	JQ520328	15	C1	East europe unspecified horse	Europe
1901	AB329604	15	C1	Mongolian horse	East Asia
1902	AY136786	15	C1	Guanzhong horse	East Asia
1903	MG001447	15	C1	East asia unspecified horse	East Asia
1904	EU203727	15	C1	Guanzhong horse	East Asia
1905	EU203729	15	C1	Guanzhong horse	East Asia
1906	EU203731	15	C1	Guanzhong horse	East Asia
1907	EU203741	15	C1	Guanzhong horse	East Asia
1908	EU203746	15	C1	Guanzhong horse	East Asia
1909	EU203810	15	C1	Guizhou horse	East Asia
1910	EU203811	15	C1	Guizhou horse	East Asia
1911	EU203816	15	C1	Hasake horse	East Asia
1912	EU433701	15	C1	East asia unspecified horse	East Asia
1913	EU433760	15	C1	East asia unspecified horse	East Asia
1914	EU433765	15	C1	East asia unspecified horse	East Asia
1915	EU433784	15	C1	East asia unspecified horse	East Asia
1916	EU433786	15	C1	East asia unspecified horse	East Asia
1917	EU433806	15	C1	East asia unspecified horse	East Asia
1918	FJ204339	15	C1	Tuva ancient horse	ancient
1919	FJ502835	15	C1	East asia unspecified horse	East Asia
1920	FJ718997	15	C1	East asia unspecified horse	East Asia
1921	GQ203134	15	C1	Baise horse	East Asia
1922	GU734781	15	C1	East asia unspecified horse	East Asia
1923	HQ592965	15	C1	Mongolian	East Asia
1924	JN224842	15	C1	Mongolian	East Asia
1925	JN790895	15	C1	Mongolian	East Asia
1926	JN790900	15	C1	Mongolian	East Asia
1927	JQ340120	15	C1	East asia unspecified horse	East Asia
1928	JQ360762	15	C1	East asia unspecified horse	East Asia
1929	JQ360820	15	C1	East asia unspecified horse	East Asia
1930	KT167206	15	C1	East asia unspecified horse	East Asia
1931	KT211059	15	C1	Debao pony	East Asia
1932	KT211090	15	C1	Elunchun	East Asia
1933	MG001448	15	C1	Yimen	East Asia
1934	HQ439455	15	C1	Clydesdale	Europe
1935	KU711097	15	C1	Arabian horse	West Asia
1936	KU711109	15	C1	Arabian horse	West Asia
1937	AY246232	15	C1	Garrano	Europe
1938	AY246250	15	C1	Noriker	Europe
1939	AY462450	15	C1	Maremmano	Europe
1940	EU750716	15	C1	Sicilian Indigenous	Europe
1941	JF804142	15	C1	Itanlian unspecified horse	Europe
1942	KF192435	15	C1	Itanlian unspecified horse	Europe
1943	KF192436	15	C1	Itanlian unspecified horse	Europe
1944	KF192437	15	C1	Itanlian unspecified horse	Europe
1945	KF192438	15	C1	Itanlian unspecified horse	Europe
1946	KF192439	15	C1	Itanlian unspecified horse	Europe
1947	KP212462	15	C1	Itanlian unspecified horse	Europe
1948	KR013115	15	C1	Itanlian unspecified horse	Europe
1949	KU601704	15	C1	South Asia unspecified horse	Europe
1950	KU601707	15	C1	South Asia unspecified horse	Europe
1951	KU601708	15	C1	South Asia unspecified horse	Europe
1952	KU601709	15	C1	South Asia unspecified horse	Europe
1953	KU601713	15	C1	South Asia unspecified horse	Europe
1954	KU601714	15	C1	South Asia unspecified horse	Europe
1955	KU601717	15	C1	South Asia unspecified horse	Europe
1956	KU601718	15	C1	South Asia unspecified horse	Europe
1957	KU601720	15	C1	South Asia unspecified horse	Europe
1958	KU601721	15	C1	South Asia unspecified horse	Europe
1959	KU711187	15	C1	Esperia	Europe
1960	KU711205	15	C1	Giara	Europe
1961	KU711215	15	C1	Giara	Europe
1962	KU711216	15	C1	Giara	Europe
1963	KU711289	15	C1	Maremmano	Europe
1964	KU711301	15	C1	Maremmano	Europe
1965	KU711304	15	C1	Maremmano	Europe
1966	KU711309	15	C1	Maremmano	Europe
1967	KU711325	15	C1	Maremmano	Europe
1968	KU711341	15	C1	Monterufolino	Europe
1969	KU711414	15	C1	Sarcidano	Europe
1970	KU711431	15	C1	Sardinian Anglo-Arab	Europe
1971	KU711456	15	C1	Sardinian Anglo-Arab	Europe
1972	KU711465	15	C1	Sardinian Anglo-Arab	Europe
1973	KU711467	15	C1	Sardinian Anglo-Arab	Europe
1974	KU711470	15	C1	Sardinian Anglo-Arab	Europe
1975	KU711471	15	C1	Sardinian Anglo-Arab	Europe
1976	KU711473	15	C1	Sardinian Anglo-Arab	Europe
1977	KU711480	15	C1	Sardinian Anglo-Arab	Europe
1978	KU711482	15	C1	Tolfetano	Europe
1979	HE565669	15	C1	South Asia unspecified horse	East Asia
1980	HE572616	15	C1	South Asia unspecified horse	East Asia
1981	AF481264	15	C1	Cukorova	West Asia
1982	DQ327971	15	C1	Mesenskay	West Asia
1983	DQ327972	15	C1	Mesenskay	West Asia
1984	DQ328003	15	C1	Orlov	West Asia
1985	JQ936391	15	C1	Eurosian unspecified horse	West Asia
1986	JQ936400	15	C1	Eurosian unspecified horse	West Asia
1987	KT827406	15	C1	Eurosian unspecified horse	West Asia
1988	KT827407	15	C1	Eurosian unspecified horse	West Asia
1989	KT827408	15	C1	Eurosian unspecified horse	West Asia
1990	KT827409	15	C1	Eurosian unspecified horse	West Asia
1991	AJ413866	15	C1	Scottish Highland	Europe
1992	AJ413873	15	C1	Scottish Highland	Europe
1993	AY057411	15	C1	Lipizzan	Europe
1994	AY246190	15	C1	Belgian	Europe
1995	AY246191	15	C1	Belgian	Europe
1996	AY246209	15	C1	Cleveland Bay	Europe
1997	AY246210	15	C1	Cleveland Bay	Europe
1998	AY246213	15	C1	Cleveland Bay	Europe
1999	DQ327853	15	C1	Kerry Bog Pony	Europe
[truncated: 3,181 more rows]
